1 **Title:** Hydroxychloroquine and mortality risk of patients with COVID-19: a systematic review and  
2 meta-analysis of human comparative studies

3  
4 Thibault Fiolet<sup>1,2\*</sup>, Anthony Guihur<sup>3</sup>, Mathieu Rebeaud<sup>3</sup>, Matthieu Mulot<sup>4</sup>, Yahya Mahamat-Saleh<sup>1,2</sup>

5  
6  
7 <sup>1</sup>CESP, Fac. de médecine - Univ. Paris-Sud, Fac. de médecine - UVSQ, INSERM, Université Paris  
8 Saclay, 94 805, Villejuif, France

9 <sup>2</sup>Gustave Roussy, F-94805, Villejuif, France

10 <sup>3</sup>Department of Plant Molecular Biology, Faculty of Biology and Medicine, University of Lausanne,  
11 Switzerland

12 <sup>4</sup>Laboratory of Soil Biodiversity, Faculty of Science, University of Neuchâtel, Switzerland.

13  
14 **Corresponding author:**

15 \*Thibault Fiolet, MSc, PhD candidate in Epidemiology

16 Center for Research in Epidemiology and Population Health

17 Inserm U1018 “Health across Generations” Team and Paris-Sud 11 University/Paris-Saclay University

18 114 rue Edouard Vaillant

19 94805 Villejuif Cedex

20 E-mail: [Thibault.fiolet@gustaveroussy.fr](mailto:Thibault.fiolet@gustaveroussy.fr)

21 Twitter: [@T\\_Fiolet](https://twitter.com/T_Fiolet)

22  
23 **Last name and degree of authors:**

24 Fiolet, *MPH*, Rebeaud, Msc, Guihur, *PhD*, Mulot, *PhD*, Mahamat-Saleh, *MPH*,

25  
26 **Abbreviations:** HCQ: Hydroxychloroquine; AZ: Azithromycin; RR: Relative Risk; HR: Hazard  
27 Ratio, OR: Odds Ratio; US FDA: US Food and Drug Administration; EMA: European Medicine  
28 Agency, CI: Confidence Interval

29  
30 **Contributors:** TF designed the research. TF, MR, AG, MM and YMS conducted the research. TF did  
31 the statistical analysis. TF wrote the first draft of the paper. MR, AG, MM and YMS contributed to the  
32 writing of the paper. All authors contributed to the data interpretation, revised each draft for important  
33 intellectual content, and read and approved the final manuscript.

34  
35 **Competing interests:** All authors declare: no support from any organisation for the submitted work  
36 other than that described above; no financial relationships with any organisations that might have an  
37 interest in the submitted work in the previous three years; no other relationships or activities that could  
38 appear to have influenced the submitted work.

39  
40  
41 **Word count: 3,589**

42  
43 **Number of figures: 3**

44 **Number of tables: 2**

45 **Supplemental material:**

46 Supplementary Figures: 8

47 Supplementary Tables: 2

48 Supplementary File: 1 Excel file

49  
50 **Keywords:** COVID-19; SARS-CoV-2 ; hydroxychloroquine ; mortality ; meta-analysis ; azithromycin

51  
52  
53 **NOTE:** This preprint reports new research that has not been certified by peer review and should not be used to guide clinical practice.

**Abstract**

54 **Background:** Global COVID-19 deaths reached at least 400,000 fatalities. Hydroxychloroquine is an  
55 antimalarial drug that elicit immunomodulatory effects and had shown in vitro antiviral effects against  
56 SRAS-CoV-2. This drug divided opinion worldwide in the medical community but also in the press,  
57 the general public and in public health policies. The aim of this systematic review and this meta-  
58 analysis was to bring a new overview on this controversial drug and to assess whether  
59 hydroxychloroquine could reduce COVID-19 mortality risk in hospitalized patients.

60  
61 **Methods and Findings:** Pubmed, Web of Science, Cochrane Library, MedRxiv and grey literature  
62 were searched until 10 June 2020. Only studies of COVID-19 patients treated with  
63 hydroxychloroquine (with or without azithromycin) compared with a comparative standard care group  
64 and with full-text articles in English were included. Studies reporting effect sizes as Odds Ratios,  
65 Hazard Ratio and Relative Risk for mortality risk and the number of deaths per groups were included.  
66 This meta-analysis was conducted following PRISMA guidelines and registered on PROSPERO  
67 (Registration number: CRD42020190801). Independent extraction has been performed by two  
68 independent reviewers. Effect sizes were pooled using a random-effects model.

69  
70 The initial search led to 112 articles, from which 16 articles met our inclusion criteria. 15 studies  
71 were retained for association between hydroxychloroquine and COVID-19 survival including 15,081  
72 patients (8,072 patients in the hydroxychloroquine arm and 7,009 patients in the standard care arm  
73 with respectively, 1,578 deaths and 1,423 deaths). 6 studies were retained for hydroxychloroquine  
74 with azithromycin. Hydroxychloroquine was not significantly associated with mortality risk (pooled  
75 Relative Risk RR=0.82 (95% Confidence Interval: 0.62-1.07,  $I^2=82$ ,  $P_{\text{heterogeneity}} < 0.01$ ,  $n=15$ )) within  
76 hospitalized patients, nor in association with azithromycin (pooled Relative Risk RR=1.33 (95% CI:  
77 0.92-1.92,  $I^2=75\%$ ,  $P_{\text{heterogeneity}} < 0.01$ ,  $n=6$ )), nor in the numerous subgroup analysis by study design,  
78 median age population, published studies (vs unpublished articles), level of bias risk. However,  
79 stratified analysis by continents, we found a significant decreased risk of mortality associated with  
80 hydroxychloroquine alone but not with azithromycin among European (RR= 0.62 (95%CI: 0.41-0.93,  
81  $n=7$ )) and Asian studies (RR=0.36 (95%CI:0.18-0.73,  $n=1$ )), with heterogeneity detected across  
82 continent ( $P_{\text{heterogeneity between}}=0.003$ ). These finding should be interpreted with caution since several  
83 included studies had a low quality of evidence with a small sample size, a lack of adjustment on  
84 potential confounders or selection and intervention biases.

85  
86 **Conclusion:** Our meta-analysis does not support the use of hydroxychloroquine with or without  
87 azithromycin to reduce COVID-19 mortality in hospitalized patients. It raises the question of the  
88 hydroxychloroquine use outside of clinical trial. Additional results from larger randomised controlled  
89 trials are needed

90  
91  
92  
93  
94  
95  
96  
97  
98  
99  
100  
101  
102  
103  
104  
105  
106  
107  
108

## Introduction

109 On December 31, 2019, World Health Organization (WHO) identified in Wuhan (China) an unknown  
110 pneumonia caused by a new coronavirus, SARS-CoV-2. This new coronavirus rapidly spread around  
111 the world and on the 11<sup>th</sup> of March, the WHO declared it as a pandemic. By 17 June, 2020, WHO  
112 confirmed 8,006,427 cases and 436,899 deaths.

113  
114 Recent publications identified the *in vitro* antiviral activity against SARS-CoV-2 of  
115 hydroxychloroquine (HCQ), an aminoquinoline like chloroquine. HCQ appeared as a potential  
116 treatment for COVID-19 patients at low costs(1). HCQ is also used as antimalarial drug, for  
117 rheumatoid arthritis and for lupus. This drug was widely advertised by international press and the  
118 United States President(2). Three *in vitro* studies tested HCQ on VeroE6 cells infected by SARS-CoV-  
119 2. This later suggested that HCQ decreased the viral replication with 50% inhibitory concentration  
120 (IC50) values of 2.2  $\mu\text{M}$  (0.7  $\mu\text{g}/\text{mL}$ ) and 4.4  $\mu\text{M}$  (1.4  $\mu\text{g}/\text{mL}$ ) in Maisonnasse *et al.* study, at 0.72  $\mu\text{M}$   
121 in Yao *et al.* study and between 4.51 – 12.96  $\mu\text{M}$  for 50% maximal effective concentration (EC50) in  
122 Liu *et al.* study (1–3). Another study reported a synergistic effect of the HCQ with azithromycin (AZ)  
123 against SARS-CoV-2(6). The mechanism would be an acidification of the endosomes pH, and this pH  
124 modification would block the virus-endosome fusion (7).

125  
126 Hydroxychloroquine was also tested in a study where macaques were infected by SARS-CoV-2 and  
127 received either a high dose of hydroxychloroquine (90 mg/kg on day 1 then 45 mg/kg) either a low  
128 HCQ dose (30 mg/kg on day 1 then 15 mg/kg) (3). Hydroxychloroquine did not improve the time to  
129 viral clearance. Another study in preprint also reported that there is no evidence of efficacy for the  
130 drug hydroxychloroquine (6.5 mg/kg) against infection with SARS-CoV-2 in hamsters or macaque  
131 models(8).

132  
133 By June 17, about 132 trials have been referenced to test hydroxychloroquine for COVID-19 on  
134 ClinicalTrials.gov (9). Until today, most of the published studies on hydroxychloroquine with a  
135 comparative group (standard care) were observational and non-randomized with inconsistent results  
136 (10–16). This study is the first meta-analysis to pool adjusted relative risk and to include 16 studies.  
137 Previous meta-analysis on COVID-19 included a very limited number of studies and used unadjusted  
138 risk ratio (17–19). Thus, the aim of this meta-analysis was to provide a systematically quantitative  
139 assessment of the association between HCQ treatment (vs standard care) and COVID-19 survival risk  
140 among human trials and observational studies.

141  
142

## 143 **Material and methods**

### 144 **Data sources, search strategy**

145 Research question was: does hydroxychloroquine treatment (vs standard care) have an effect (positive  
146 or negative) on survival of patients with COVID-19? A search was performed via PubMed and Web of  
147 Science and Cochrane Review until 10 June 2020 with this string search: (COVID-19 OR SRAS-CoV-  
148 2) AND (MORTALITY OR DEATH) AND (HYDROXYCHLOROQUINE OR HCQ)  
149 (Supplementary text S1). Given that the number of articles about hydroxychloroquine and COVID-19  
150 is rapidly growing, we also manually searched additional reference on MedRxiv preprint server and on  
151 google scholar. The language was limited to English. This meta-analysis was conducted following  
152 PRISMA statements in Supplementary text S2. This study has been recorded on the international  
153 database of prospectively registered systematic reviews, PROSPERO (Registration number:  
154 CRD42020190801).

155  
156  
157  
158

### 159 **Criteria for study selection:**

160 Inclusion criteria were 1) reports must contain original data with available risk estimates (Hazard  
161 Ration, Odds Ratios, Relative Risk and/or with data on the number of death in HCQ and control  
162 groups 2) all publication dates will be considered 3) publications in English language 4) comparative  
163 studies with a control group without hydroxychloroquine and 5) COVID-19 confirmed cases by RT-  
164 PCR. Reviews and meta-analysis, commentaries, *in vitro* and *in vivo* studies were excluded.

165

## 166 **Data extraction**

167 Data extraction was performed by two investigators (Mr. T. Fiolet and Mr. Y. Mahamat-Saleh) who  
168 screened the titles and abstracts. Discrepancies were resolved by a third investigator (Dr. Anthony  
169 Guihur).

170 The following data were extracted from each study: study design, publication date, location, number  
171 of participants (total, in treatment and control groups, doses when available, effect size (Hazard Ratio,  
172 Odds Ratio or Relative Risk) and 95% confidence intervals for reported risk estimates. Hazard Ratio  
173 (HR) refers to the ratio of hazards in the intervention group divided by those occurring in the control  
174 group. Hazard represents the instantaneous event rate, which means the probability that an individual  
175 would experience an event (e.g. death) at a particular given point in time after the intervention,  
176 assuming that this individual has survived to that particular point of time without experiencing any  
177 event. In contrast, Relative Risk (RR) and Odds Ratio (OR) does not take account of the timing of  
178 each event. RR and OR are similar when the event (death) is rare. The most adjusted effect size  
179 reflecting the greatest control of potential confounders was extracted.

180 Three included studies did not report effect size for mortality risk (15,20,21). Thus we used the  
181 number of death per groups to calculate an unadjusted relative risk using *metabin* function in *meta*  
182 package in R Software (22). RR calculation is based on Cochrane Handbook for Systematic Reviews

183 of Interventions formula  $RR = \frac{\frac{\text{number of deaths in treatment group}}{\text{number of participants in treatment group}}}{\frac{\text{number of deaths in control group}}{\text{number of participants in control group}}}$  (23)

184 For all the other studies, reported adjusted OR, RR or HR were used. The quality of each study was  
185 assessed with ROBIN-I tool following Cochrane guidelines for non-randomized studies and with Rob2  
186 for randomized studies (24,25).

187

## 188 **Outcome**

189 The outcome is COVID-19 mortality.

190

## 191 **Statistical analysis**

### 192 Effect of HCQ alone and HCQ + AZ

193 A primary meta-analysis was performed to assess the association between hydroxychloroquine alone  
194 (vs standard care) and risk of death. In a second time, the relationship between hydroxychloroquine  
195 associated with azithromycin and mortality was assessed. HRs, ORs and RRs were treated as  
196 equivalent measures of mortality risk. Pooled RRs were determined by using a random effect model  
197 with inverse variance weighting (DerSimonian-Laird method) (26). Significance was checked by Z-  
198 test ( $p < 0.05$  was considered as significant).

199

200 Heterogeneity was assessed by the Chi-square test and  $I^2$  test.  $30\% < I^2 < 60\%$  was interpreted as  
201 moderate heterogeneity and  $I^2 > 60$  as high heterogeneity. Funnel plot was constructed to assess the  
202 publication bias. Begg's and Egger's test were conducted to assess the publication bias (7,27). RR or  
203 HR and their 95% confidence interval were used to assessed mortality risk.

204

205

206

207 **Subgroup analysis**

208 Subgroup analyses were further conducted according to the quality assessment to explore the source of  
 209 heterogeneity among observational studies. We performed stratified analyses by continents, the type  
 210 of article (peer-reviewed vs unpublished), the use of an adjustment on confounding factors (studies  
 211 with  $RR_{unadjusted}$  vs  $RR_{adjusted}$ ), the mean daily dose of hydroxychloroquine (continuous), the median  
 212 population age across the studies (median age > 63 years) and the level of bias risk identified with  
 213 ROBIN-I (moderate/serious/critical) (24), the exclusion of studies with cancer and dialysis patients.  
 214 Mean daily dose of hydroxychloroquine is a daily average between the loading dose and the  
 215 maintenance doses. Additionally, influence analysis was conducted by omitting each study to find  
 216 potential outliers (28). It is used to detect studies which influence the overall estimate of our meta-  
 217 analysis the most, omitting one study at a time (leave-one-out method).

218  
 219

220 A two-sided p-value < 0.05 was considered statistically significant. All analysis were conducted using  
 221 R version 3.6.1 with *meta* package and *robvis* package (29).

222

223 **Results**

224 **Literature Search**

225 After searching Pubmed and Web of Science, 105 results were identified. 7 articles from  
 226 Medrxiv/Google Scholar were added. After screening the title and the abstract, only 9 articles about  
 227 hydroxychloroquine and COVID-19 were included. 144 articles were excluded for not meeting the  
 228 inclusion criteria. 16 articles were included for further consideration including 14 observational  
 229 studies and one non-randomized trial and one unpublished randomized controlled trial (RCT): 15  
 230 articles for HCQ (10–17,20,21,30–34) and 6 articles for HCQ+AZ (10,16,30,31,35,36). Flow chart is  
 231 presented in Figure 1.

232

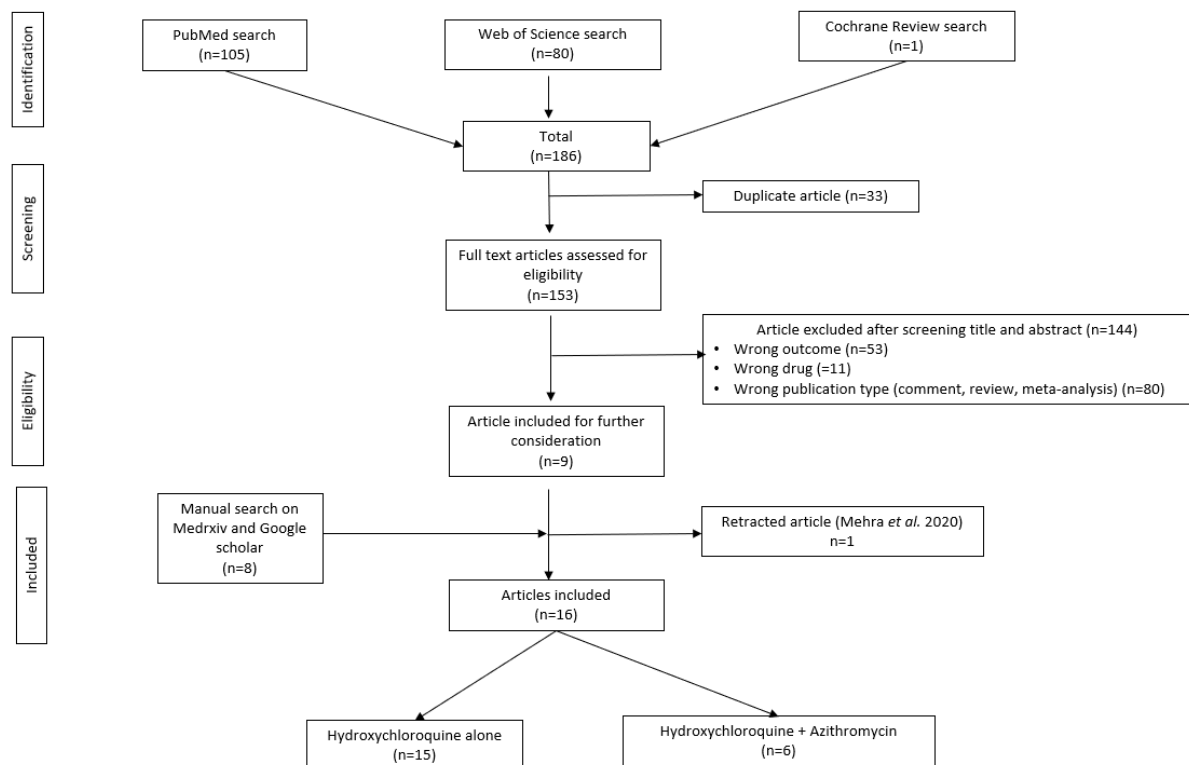

233

234 Figure 1: Flow diagram of study selection process

235

236 **Study characteristics**

237 This meta-analysis includes 8,072 patients in the hydroxychloroquine group and 7,009 patients in the  
238 standard care group with respectively 1,578 deaths and 1,423 deaths. Individual studies are described  
239 in Table 1. It appears that all the included studies were carried on hospitalized patients. No study  
240 meeting our inclusion criteria addressed the effect of HCQ on asymptomatic forms of COVID-19.  
241 Mean and median age of participants ranged from 53 to 72 across the studies. Studies were conducted  
242 in the USA (n=6) (13,16,20,30,31,36), in Spain (n=4) (14,15,33,35), in France (n=2) (11,21), in the  
243 UK (n=1)(37), in Italy (n=1) (32), in China (n=1) (12) and in 3 countries (USA, Canada and  
244 Spain)(10). 9 articles were published, and 4 articles were preprints. RECOVERY Trial data were  
245 reported by a press communication (34,37). Mean daily dose of hydroxychloroquine ranged from 333  
246 mg/j to 945 mg/j.

247

248

249

| First Author                   | Journal                                | Type of study         | Country                | Number of deaths |              | Number of participants |      | Treatment                                                      | Mean HCQ dose per day | Age <sup>a</sup> (years) | Patients                                                                  | Study quality |
|--------------------------------|----------------------------------------|-----------------------|------------------------|------------------|--------------|------------------------|------|----------------------------------------------------------------|-----------------------|--------------------------|---------------------------------------------------------------------------|---------------|
|                                |                                        |                       |                        | Control          | HCQ          | Control                | HCQ  |                                                                |                       |                          |                                                                           |               |
| Alberici et al(32), 2020       | Kidney International                   | Observational, cohort | Italy                  | Not reported     | Not reported | 22                     | 72   | Not specified                                                  | NA                    | 72 (median)<br>IQ=62-79  | Hospitalized patients with haemodialysis                                  | Critical      |
| Ayerbe et al(15), 2020         | Journal of Thrombosis and Thrombolysis | Observational, cohort | Spain                  | 49               | 237          | 162                    | 1857 | Not specified                                                  | NA                    | 67,57 (mean)             | Hospitalized patients                                                     | Serious       |
| Barbosa Joshua et al(20), 2020 | Unpublished                            | Observational, cohort | USA                    | 1                | 2            | 21                     | 17   | 800 mg for 2 days then 200-400mg for 3-4 days                  | 600                   | 62.7 (mean)<br>SD=15.1   | Hospitalized patients (mild/moderate symptoms)                            | Critical      |
| Geleris et al(13), 2020        | NEJM                                   | Observational, cohort | USA                    | 75               | 157          | 565                    | 811  | 1200mg at day 1 then 400mg for 4 days                          | 560                   | From <40 to >80          | Hospitalized patients (moderate/severe symptoms)                          | Moderate      |
| Ip et al(31), 2020             | PrePrint                               | Observational, cohort | USA                    | 115              | 432          | 598                    | 1914 | 800mg at day 1 then 400mg on day 2-5 (80%)                     | 400                   | 64 (median)<br>IQ=52-76  | Hospitalized patients (44% moderate/severe symptoms)                      | Moderate      |
| Kuderer et al(10), 2020        | The Lancet                             | Observational, cohort | USA<br>Canada<br>Spain | 41               | 11           | 486                    | 89   | Not specified                                                  | NA                    | 66 (median)<br>IQ=57-76  | Hospitalized patients with who have a current or past diagnosis of cancer | Moderate      |
| Magagnoli et al(30), 2020      | Clinical Advances                      | Observational, cohort | USA                    | 37               | 38           | 395                    | 198  | Median HCQ dose: 400mg/day<br>Median HCQ+AZ dose: 422.2 mg/day | 400                   | 70 (median)<br>IQ=60-75  | Hospitalized patients                                                     | Serious       |
| Mahevas et al(11), 2020        | BMJ                                    | Observational, cohort | France                 | 8                | 9            | 89                     | 84   | 600mg/day                                                      | 600                   | 60 (median)<br>IQ=52-68  | Hospitalized patients with covid-19                                       | Moderate      |

|                                  |                                               |                                 |        |              |              |      |      |                                                                                 |     |                                  |                                                                                   |                |
|----------------------------------|-----------------------------------------------|---------------------------------|--------|--------------|--------------|------|------|---------------------------------------------------------------------------------|-----|----------------------------------|-----------------------------------------------------------------------------------|----------------|
|                                  |                                               |                                 |        |              |              |      |      |                                                                                 |     |                                  | pneumonia who require oxygen:                                                     |                |
| Membrillo et al(14), 2020        | PréPrint                                      | Observational, cohort           | Spain  | 21           | 27           | 43   | 123  | Loading dose of 800 mg + 400 mg in following days (ten days for moderate cases) | 440 | HCQ: 61.5<br>No HCQ: 68.7 (mean) | Hospitalized patients                                                             | Serious        |
| Philippe Gautret et al(21), 2020 | International Journal of Antimicrobial Agents | Non-randomised controlled trial | France | 0            | 1            | 16   | 26   | A maintenance dose of 600 mg/day                                                | 600 | 45,1 (mean)<br>SD=22             | Hospitalized patients (mild symptoms)                                             | Critical       |
| RECOVERY TRIAL                   | Unpublished                                   | Randomized controlled trial     | UK     | 736          | 396          | 3132 | 1542 | A loading dose of 2400mg at day 1, then 800mg/day for 10 days                   | 945 | Not specified                    | Hospitalized patients                                                             | Not applicable |
| Rogado et al(35), 2020           | Clinical and Translational Oncology           | Observational, cohort           | Spain  | Not reported | Not reported | 8    | 18   | Not specified                                                                   | NA  | 71 (median)<br>Range:34-90       | Hospitalized patients (64% severe cases)                                          | Critical       |
| Rosenberg et al(16), 2020        | JAMA                                          | Observational, cohort           | USA    | 28           | 54           | 221  | 271  | 400mg then 200-400mg at 2nd prescription then 200-400mg at 3rd                  | 333 | 63 (median)                      | Hospitalized patients                                                             | Moderate       |
| Sanchez-Alvarez et al(33), 2020  | Nefrología                                    | Observational, cohort           | Spain  | 32           | 166          | 53   | 322  | Not specified                                                                   | NA  | 71<br>SD=15                      | (85%) required hospital admission, 8% in intensive care units, with haemodialysis | Serious        |
| Singh et al(36), 2020            | PrePrint                                      | Observational, cohort           | USA    | 104          | 109          | 910  | 910  | Not specified                                                                   | NA  | 62<br>SD=17                      | Hospitalized patients                                                             | Serious        |
| Yu et al(12),                    | Science                                       | Observational,                  | China  | 238          | 9            | 502  | 48   | 400mg during                                                                    | NA  | 68 (median)                      | Critically ill                                                                    | Serious        |



|      |                     |        |  |  |  |  |  |           |  |           |          |  |
|------|---------------------|--------|--|--|--|--|--|-----------|--|-----------|----------|--|
| 2020 | China Life Sciences | cohort |  |  |  |  |  | 7-10 days |  | IQ: 59-77 | patients |  |
|------|---------------------|--------|--|--|--|--|--|-----------|--|-----------|----------|--|

Table 1 (continued): Characteristics of studies included in the meta-analysis for COVID-19 mortality  
 IQ=Interquartile range, SD=Standard Deviation, HCQ=Hydroxychloroquine, AZ=Azithromycine, NA=Not available

| First Author                         | Effect size reported in each study <sup>b</sup> | Adjustments                                                                                                                                                                                                                                                                                                                                                                                                                                                                                                                                                                       | Treatment           | Control                                          |
|--------------------------------------|-------------------------------------------------|-----------------------------------------------------------------------------------------------------------------------------------------------------------------------------------------------------------------------------------------------------------------------------------------------------------------------------------------------------------------------------------------------------------------------------------------------------------------------------------------------------------------------------------------------------------------------------------|---------------------|--------------------------------------------------|
| Alberici et al(32), 2020             | OR=0,44 [0,16-1,24]                             | Not adjusted                                                                                                                                                                                                                                                                                                                                                                                                                                                                                                                                                                      | HCQ alone           | Other antiviral and antibiotic were administered |
| Ayerbe et al(15), 2020               | RR <sub>calculated</sub> =0,422 [0,325-0,546]   | Not adjusted                                                                                                                                                                                                                                                                                                                                                                                                                                                                                                                                                                      | HCQ alone           | Other antiviral and antibiotic were administered |
| Barbosa Joshua et al(20), 2020       | RR <sub>calculated</sub> =2,47 [0,24-24,98]     | Not adjusted                                                                                                                                                                                                                                                                                                                                                                                                                                                                                                                                                                      | HCQ alone           | Supportive care                                  |
| Geleris et al(13), 2020              | HR=1,04 [0,82-1,32]                             | inverse probability weighting from a propensity-score                                                                                                                                                                                                                                                                                                                                                                                                                                                                                                                             | HCQ alone           | Standard care not specified                      |
| Ip et al(31), 2020                   | HR=0.99 [0.8-1.22]<br>HR=0.98 [0.75-1.28]       | Cox model adjusted on the propensity-score variable: gender, coronary disease, stroke, heart failure, arrhythmia, African American, COPD, , renal failure, rheumatologic disorder, inflammatory bowel disease, advanced liver disease, age, diabetes mellitus, insulin use prior to hospitalization, asthma, HIV/hepatitis, any cancer, and log ferritin                                                                                                                                                                                                                          | HCQ alone<br>HCQ+AZ | Group without drug                               |
| Kuderer et al(10), 2020 <sup>c</sup> | OR=1,06 [0,51,2,2]<br>OR=2.93 [1.79-4.79]       | Adjusted for age, sex, smoking status, and obesity                                                                                                                                                                                                                                                                                                                                                                                                                                                                                                                                | HCQ alone<br>HCQ+AZ | Treatment without AZ                             |
| Magagnoli et al(30), 2020            | HR=1.83 [1.16-2.89]<br>HR=1.31 [0.80-2.15]      | Propensity score adjustment. All baseline covariates were included in the propensity score models (age, race, BMI, SpO2, breaths per minute, heart rate, T°, systolic blood pressure, ALT, AST, serum albumin, Total bilirubin, Creatinine, Erythrocytes, Haematocrit, Leukocytes, Lymphocytes, Platelets, Blood urea nitrogen, C-reactive protein                                                                                                                                                                                                                                | HCQ alone<br>HCQ+AZ | Standard care                                    |
| Mahevas et al(11), 2020              | HR=1,2 [0,4,3,3]                                | Inverse probability of treatment weighting in Cox model. age, sex, comorbidities (presence of chronic respiratory insufficiency during oxygen treatment, or asthma, cystic fibrosis, or any chronic respiratory disease likely to result in decompensation during a viral infection; heart failure (New York Heart Association class III or IV); chronic kidney disease; liver cirrhosis with Child-Pugh class B or more; personal history of cardiovascular disease (hypertension, stroke, coronary artery disease, or cardiac surgery); insulin dependent diabetes mellitus, or | HCQ alone           | Standard care                                    |

|                                  |                                               |                                                                                                                                                                                                                                                                                                                                                                                                                                                                                                                                                                                                                                                                                            |                     |                                                                             |
|----------------------------------|-----------------------------------------------|--------------------------------------------------------------------------------------------------------------------------------------------------------------------------------------------------------------------------------------------------------------------------------------------------------------------------------------------------------------------------------------------------------------------------------------------------------------------------------------------------------------------------------------------------------------------------------------------------------------------------------------------------------------------------------------------|---------------------|-----------------------------------------------------------------------------|
|                                  |                                               | diabetic microangiopathy or macroangiopathy; treatment with immunosuppressive drugs, including anticancer chemotherapy; uncontrolled HIV infection or HIV infection with CD4 cell counts <200/ $\mu$ L; or a haematological malignancy); body mass index ( $\geq 30$ or not); third trimester of pregnancy; treatment by angiotensin converting enzyme inhibitors or angiotensin receptor blockers <sup>13</sup> ; time since symptom onset; and severity of condition at admission (percentage of lung affected: $\geq 50\%$ or not; presence of confusion; respiratory frequency; oxygen saturation without oxygen; oxygen flow; systolic blood pressure; and C reactive protein level). |                     |                                                                             |
| Membrillo et al(14), 2020        | OR=0,07 [0,012,0,402]                         | Adjusted on variables with $p < 0,25$ in univariate analysis                                                                                                                                                                                                                                                                                                                                                                                                                                                                                                                                                                                                                               | HCQ alone           | Standard care + other antivirals, immunomodulators, anti-inflammatory drugs |
| Philippe Gautret et al(21), 2020 | RR <sub>calculated</sub> =3,41 [0,1505,77,45] | Not adjusted                                                                                                                                                                                                                                                                                                                                                                                                                                                                                                                                                                                                                                                                               | HCQ alone           | Group without HCQ                                                           |
| RECOVERY TRIAL                   | HR=1,1 [0,98,1,26]                            | Adjustment not precised                                                                                                                                                                                                                                                                                                                                                                                                                                                                                                                                                                                                                                                                    | HCQ alone           | Standard care                                                               |
| Rogado et al(35), 2020           | OR=0,02 [0,01,0,73]                           | Adjusted by median age, histology, staging, cancer treatment received and hypertension                                                                                                                                                                                                                                                                                                                                                                                                                                                                                                                                                                                                     | HCQ+AZ              | Group without HCQ                                                           |
| Rosenberg et al(16), 2020        | HR=1,08 [0,63,1,85]<br>HR=1.35 [0.76-2.4]     | Multiple adjustments on potential confounders (age>65, sex, hospital, comorbidities, respiratory capacities)                                                                                                                                                                                                                                                                                                                                                                                                                                                                                                                                                                               | HCQ alone<br>HCQ+AZ | Group without drug                                                          |
| Sanchez-Alvarez et al(33), 2020  | OR=0,471 [0,28,0,792]                         | No information about adjustments in logistic regression                                                                                                                                                                                                                                                                                                                                                                                                                                                                                                                                                                                                                                    | HCQ alone           | Standard care + other antivirals                                            |
| Singh et al(36), 2020            | HR=0,95 [0,74,1,23]<br>HR=1.19 [0.89-1.60]    | Creation of groups based on propensity score matching for age, gender, race, confounding comorbidities                                                                                                                                                                                                                                                                                                                                                                                                                                                                                                                                                                                     | HCQ alone<br>HCQ+AZ | Group without HCQ                                                           |
| Yu et al(12), 2020               | HR=0,36 [0,18,0,75]                           | Adjustment: respiratory rate, shortness of breath, alanine aminotransferase (when $p < 0,01$ in univariate Cox model)                                                                                                                                                                                                                                                                                                                                                                                                                                                                                                                                                                      | HCQ alone           | Standard care                                                               |

Table 1 (continued): Characteristics of studies included in the meta-analysis for COVID-19 mortality

IQ=Interquartile range, SD=Standard Deviation, HCQ=Hydroxychloroquine, AZ=Azithromycine, NA=Not available

<sup>a</sup>Some studies did not report mean or median age

<sup>b</sup>HR and OR are the most adjusted effect size reported in each study. Some studies did not report effect size. RR<sub>calculated</sub> were calculated using the number of death in the treatment and the control groups

250 **Study quality**

251  
252 Risk of bias was assessed with ROBIN-I for non-randomised studies (n=14) and Rob2 was not  
253 applicable for RECOVERY RCT because data were not available (Figure S1). Details on the  
254 assessment of studies quality are provided in Fig S2. Among the non-randomized studies, the majority  
255 of these observational studies had a high or critical risk of bias (10 out of 16)  
256 (12,14,15,20,21,30,32,33,35,36). Five articles had a moderate risk of bias(10,11,13,16,31). Some  
257 studies did not report adjusted effect sizes to control confusion and selection bias (15,20,21,32,33,35).  
258 Studies quality was lowered by the lack of information about the assignment of treatment, the time  
259 between start of follow-up and start of intervention), some unbalanced co-intervention with other  
260 antiviral and antibiotic drugs.

261  
262 **Hydroxychloroquine and mortality**

263 The pooled RR for COVID-19 mortality was 0.82 (95% CI: 0.62-1.07,  $I^2=82$ ,  $P_{\text{heterogeneity}} < 0.01$ , n=15)  
264 (Figure 2) indicating no significant association between hydroxychloroquine and COVID-19 survival  
265 or increased mortality. There was significant high heterogeneity across the included studies ( $I^2 = 83\%$ ,  
266  $p < 0.01$ ). Egger's test ( $p = 0.42$ ) and Begg's test ( $P = 0.88$ ) were not significant for asymmetry of the  
267 funnel plot indicating that there is not a major publication bias (Figure S3). In our separated analysis  
268 by study design, we found a positive but not significant association between hydroxychloroquine alone  
269 and mortality among interventional studies (RR: 1.10, 95%CI: 0.97-1.25,  $I^2=0\%$ ,  $P_{\text{heterogeneity within}}=0.5$ ,  
270 n=2); however an inverse but not significant association was found among observational studies (RR:  
271 0.78, 95%CI: 0.58-1.05,  $I^2=82\%$ ,  $P_{\text{heterogeneity within}} < 0.01$ ), with heterogeneity observed across the study  
272 design ( $P_{\text{heterogeneity between}} = 0.03$ ).

273  
274  
275  
276  
277  
278  
279  
280  
281  
282  
283  
284  
285  
286  
287  
288  
289  
290  
291  
292  
293  
294  
295  
296  
297  
298  
299  
300

301  
302

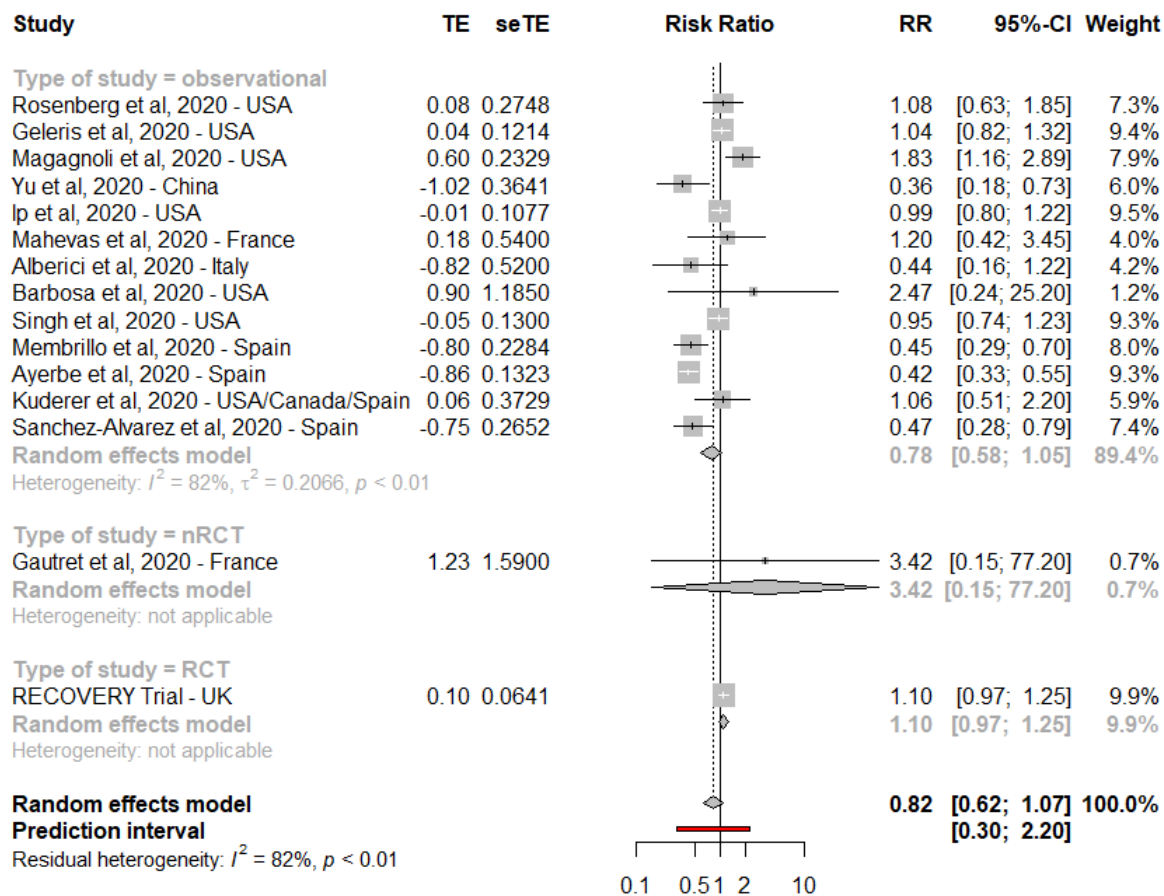

303  
304  
305  
306  
307  
308  
309  
310  
311  
312  
313  
314  
315  
316  
317  
318  
319  
320  
321  
322  
323  
324  
325

Figure 2: Meta-analysis showing association between hydroxychloroquine alone and COVID-19 mortality. RCT=Randomised Controlled Trial. nRCT=non-Randomised Controlled Trial TE=Estimated treatment effect. seTE=Standard error of treatment estimate. RR=Risk ratio. RR were not adjusted for Alberici et al, Ayerbe et al, Barbosa et al, Sanchez-Alvarez et al and Gautret et al. 95%CI= 95% Confidence Interval

### Subgroup analysis for hydroxychloroquine alone

Subgroup analysis among all studies (observational and interventional studies) per study design, type of article (peer-reviewed vs unpublished), risk estimated, age, the exclusion of cancer/haemodialysis patients identified a non-significant association in each subgroup (Table 2).

|                                                                                            | N  | Pooled Relative Risk | Heterogeneity      |                     |                      |
|--------------------------------------------------------------------------------------------|----|----------------------|--------------------|---------------------|----------------------|
|                                                                                            |    |                      | I <sup>2</sup> (%) | P <sub>within</sub> | P <sub>between</sub> |
| <b>HCQ alone</b>                                                                           |    |                      |                    |                     |                      |
| All Studies                                                                                | 15 | 0.82 [0.62-1.07]     | 82%                | <0.01               |                      |
| Study Design                                                                               |    |                      |                    |                     |                      |
| Observational                                                                              | 13 | 0.78 [0.58-1.05]     | 82%                | <0.01               | 0.03                 |
| Interventional                                                                             | 2  | 1.10 [0.97-1.25]     | 0%                 | 0.48                |                      |
| Type of article                                                                            |    |                      |                    |                     |                      |
| Peer-reviewed                                                                              | 10 | 0.78 [0.53-1.16]     | 83%                | <0.01               | 0.63                 |
| Unpublished                                                                                | 5  | 0.88 [0.63-1.24]     | 74%                | <0.01               |                      |
| Adjusted estimate                                                                          |    |                      |                    |                     |                      |
| Yes                                                                                        | 9  | 0.91 [0.67-1.24]     | 70%                | <0.01               | <0.0001              |
| No                                                                                         | 5  | 0.44 [0.35-0.56]     | 0%                 | 0.41                |                      |
| Missing                                                                                    | 1  | 1.10 [0.97-1.25]     | Not applicable     | Not applicable      |                      |
| Risk estimated                                                                             |    |                      |                    |                     |                      |
| Reported in the paper                                                                      | 12 | 0.86 [0.66-1.12]     | 73%                | <0.01               | 0.9                  |
| Calculated                                                                                 | 3  | 0.91 [0.21-3.93]     | 48%                | 0.14                |                      |
| Risk of bias                                                                               |    |                      |                    |                     |                      |
| Moderate                                                                                   | 5  | 1.02 [0.88-1.18]     | 0%                 | 0.9                 | 0.19                 |
| Serious                                                                                    | 6  | 0.63 [0.38-1.04]     | 89%                | <0.01               |                      |
| Critical                                                                                   | 3  | 0.97 [0.23-4.07]     | 31%                | 0.23                |                      |
| Continents                                                                                 |    |                      |                    |                     |                      |
| America                                                                                    | 6  | 1.05 [0.93-1.19]     | 30%                | 0.2                 | 0.003                |
| Asia                                                                                       | 1  | 0.36 [0.18-0.73]     | NA                 | NA                  |                      |
| Europe                                                                                     | 7  | 0.62 [0.41-0.93]     | 90%                | <0.01               |                      |
| Multiple                                                                                   | 1  | 1.06 [0.51-2.20]     | NA                 | NA                  |                      |
| Mean daily dose                                                                            |    |                      |                    |                     |                      |
| Not specified                                                                              | 6  | 0.58 [0.39-0.85]     | 80%                | <0.01               | 0.007                |
| <500 mg/d                                                                                  | 4  | 0.97 [0.55-1.69]     | 84%                | <0.01               |                      |
| >500 mg/d                                                                                  | 5  | 1.09 [0.98-1.22]     | 0%                 | 0.88                |                      |
| Age                                                                                        |    |                      |                    |                     |                      |
| 63 years or less                                                                           | 7  | 0.90 [0.65-1.26]     | 53%                | <0.05               | 0.1                  |
| 64 years or more                                                                           | 7  | 0.69 [0.43-1.10]     | 88%                | <0.01               |                      |
| Not specified                                                                              | 1  | 1.10 [0.97-1.07]     | NA                 | NA                  |                      |
| Cancer or haemodialysis patient based-population                                           |    |                      |                    |                     |                      |
| No                                                                                         | 12 | 0.87 [0.64-1.18]     | 84%                | <0.01               | 0.26                 |
| Yes                                                                                        | 3  | 0.61 [0.35-1.06]     | 43%                | 0.17                |                      |
| Influence analysis (exclusion of Yu et al, Magagnoli et al, Membrillo et al, Ayerbe et al) | 11 | 1.00 [0.90-1.12]     | 29%                | 0.17                |                      |
| <b>HCQ+AZI</b>                                                                             |    |                      |                    |                     |                      |
| All Studies                                                                                | 6  | 1.33 [0.91-1.91]     | 75%                | <0.01               |                      |
| Study Design                                                                               |    |                      |                    |                     |                      |
| Observational                                                                              | 6  | 1.33 [0.91-1.91]     | 75%                | <0.01               |                      |
| Interventional                                                                             | 0  |                      |                    |                     |                      |

|                                                  |   |                   |     |       |        |
|--------------------------------------------------|---|-------------------|-----|-------|--------|
| Type of article                                  |   |                   |     |       |        |
| Peer-reviewed                                    | 4 | 1.55 [0.86-2.80]  | 76% | <0.01 | 0.2    |
| Unpublished                                      | 2 | 1.07 [0.88-1.30]  | 0%  | 0.35  |        |
| Adjusted estimate                                |   |                   |     |       |        |
| Yes                                              | 6 | 1.33 [0.91-1.91]  | 75% | <0.01 |        |
| No                                               | 0 |                   |     |       |        |
| Risk estimated                                   |   |                   |     |       |        |
| Reported in the paper                            | 6 | 1.33 [0.91-1.91]  | 75% | <0.01 |        |
| Calculated                                       | 0 |                   |     |       |        |
| Risk of bias                                     |   |                   |     |       |        |
| Moderate                                         | 3 | 1.54 [0.80-2.95]  | 86% | <0.01 | 0.06   |
| Serious                                          | 2 | 1.22 [0.95-1.57]  | 0%  | 0.7   |        |
| Critical                                         | 1 | 0.02 [0.00-0.73]  | NA  | NA    |        |
| Continents                                       |   |                   |     |       |        |
| America                                          | 3 | 1.10 [0.91-1.32]  | 0%  | 0.48  | 0.0009 |
| Asia                                             | 0 |                   |     |       |        |
| Europe                                           | 2 | 0.24 [0.00-13.43] | 80% | 0.02  |        |
| Multiple                                         | 1 | 2.93 [1.79-4.79]  | NA  | NA    |        |
| Mean daily dose                                  |   |                   |     |       |        |
| Not specified                                    | 3 | 0.75 [0.08-7.21]  | 87% | <0.01 | 0.7    |
| <500 mg/d                                        | 3 | 1.10 [0.87-1.38]  | 0%  | 0.43  |        |
| >500 mg/d                                        | 0 |                   |     |       |        |
| Age                                              |   |                   |     |       |        |
| 63 years or less                                 | 2 | 1.22 [0.94-1.58]  | 0%  | 0.69  | 0.9    |
| 64 years or more                                 | 4 | 1.30 [0.62-2.71]  | 85% | <0.01 |        |
| Cancer or haemodialysis patient based-population |   |                   |     |       |        |
| No                                               | 6 | 1.33 [0.91-1.91]  | 75% | <0.01 |        |
| Yes                                              | 0 |                   |     |       |        |

326

327 Table 2. Subgroup analysis for the associations between HCQ alone or HCQ associated with AZI and  
328 mortality risk of patients with COVID-19 (observational and interventional studies)

329 N: number of studies. NA: Not applicable for a single study

330

331

332 Test for subgroup differences (observational vs nRCT vs RCT) was not significant (P=0.09)  
333 suggesting no differences in the overall effect according to the design of the studies. The pooled RR  
334 for observational studies was 0.78 (95%CI: 0.58-1.05, I<sup>2</sup>=82%, P<sub>heterogeneity within</sub> <0.01, n=13) and RR  
335 was 3.42 (95%CI: 0.15-77.20, n=1) for non-randomized controlled trial and 1.10 (95%CI: 0.97-1.25,  
336 n=1) for the RECOVERY randomized controlled trial (Figure 2).

337

338 After stratification by the level of bias from ROBIN-I evaluation, the association between  
339 hydroxychloroquine and COVID-19 mortality remained non-significant. The broadness of 95% CI and

340 heterogeneity increased with the risk of bias: moderate risk of bias (RR=1.02 [0.88-1.18],  $I^2=0$ ,  
 341  $P_{\text{heterogeneity within}}=0.9$ , n=5), serious risk of bias (RR=0.63, 95% CI: (0.38-1.04,  $I^2=89\%$ ,  $P_{\text{heterogeneity within}}$   
 342  $<0.01$ , n=6)) and critical risk of bias (RR=0.97, 95% CI: (0.23-4.07,  $I^2=31\%$ ,  $P_{\text{heterogeneity within}}=0.2$ ,  
 343 n=3)) (Figure S4).

344  
 345 In our stratified analysis by continents (Figure S5), interestingly, we found a significant decreased risk  
 346 of mortality with HCQ alone among Asian (RR<sub>Asia</sub>=0.36, 95%CI: 0.18-0.73, n=1) and European  
 347 studies (RR<sub>Europe</sub>=0.62 (95%CI: 0.41-0.93,  $I^2=90\%$ ,  $P_{\text{heterogeneity within}} <0.01$ , n=7)) but there was no  
 348 significant association among American studies, with heterogeneity detected across continent  
 349 ( $P_{\text{heterogeneity between}}=0.003$ ).

350  
 351 Furthermore, we found no association between HCQ alone and mortality by HCQ daily mean dose.  
 352 The pooled RR was 1.09 (95%CI: 0.98-1.22,  $I^2=0\%$ ,  $P_{\text{heterogeneity within}}=0.9$ , n=5), for studies with  
 353  $>500\text{mg}$ , (RR=0.97 (95%CI: 0.55-1.69,  $I^2=84\%$ ,  $P_{\text{heterogeneity within}} <0.01$ , n=4) for HCQ dose $<500\text{ mg}$   
 354 and (RR=0.58 (95%CI: 0.39-0.85,  $I^2=80\%$ ,  $P_{\text{heterogeneity within}} <0.01$ , n=6) for an unspecified dose of  
 355 HCQ, with heterogeneity detected across HCQ dose categories ( $P_{\text{heterogeneity between}}=0.007$ ).

356  
 357 In our stratified analysis by studies which reported adjusted effect sizes (vs non-adjusted), the pooled  
 358 RR for adjusted estimates was RR=0.91 (95%CI: 0.67-1.24,  $I^2=70\%$ ,  $P_{\text{heterogeneity within}} <0.01$ , n=9) and  
 359 for non-adjusted estimates RR=0.44 (95%CI: 0.35-0.56,  $I^2=0\%$ ,  $P_{\text{heterogeneity within}} <0.41$ , n=5), suggesting  
 360 differences in the overall effect according to the presence of adjustment on potential confounders.

361  
 362 Influence analysis showed that Yu et al, Membrillo et al, Ayerbe et al, Magagnoli et al are influent  
 363 studies (Figure S7). Removing these studies make heterogeneity decrease at  $I^2=0\%$  but the results  
 364 remained non-significant (RR=1.00 (95% CI: 0.0-1.13,  $I^2=29\%$ , n=11) (Table 2).

365  
 366 All the results remained similar after exclusion of the two interventional studies (Table S1).

367  
 368 **Hydroxychloroquine with azithromycin and mortality**

369 The pooled RR for COVID-19 mortality was 1.33 (95% CI: 0.91-1.921, n=6) (Figure 3) indicating no  
 370 significant association between hydroxychloroquine with azithromycin and survival. There was  
 371 significant high heterogeneity across the included studies ( $I^2=75\%$ ,  $p <0.01$ ). Egger's test ( $p=0.9$ ) and  
 372 Begg's test ( $p=0.6$ ) were not significant but the asymmetry in the funnel plot indicates that there could  
 373 be a publication bias. However, the number of included studies is small.

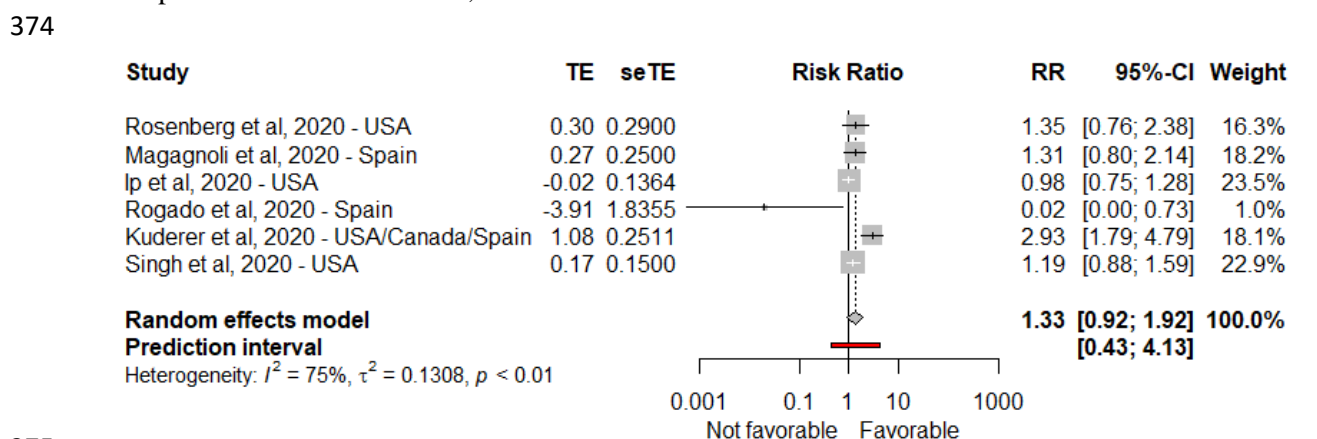

375  
 376 Figure 3: Meta-analysis showing association between hydroxychloroquine with azithromycin and  
 377 COVID-19 mortality. TE=Estimated treatment effect. seTE=Standard error of treatment estimate.  
 378 RR=Risk ratio. 95%CI= 95% Confidence Interval

379

### 380 **Subgroup analysis for hydroxychloroquine with azithromycin**

381 In all the subgroup analysis (type of article, effect size, risk of bias, continent, mean daily dose, age,  
382 exclusion of cancer and haemodialysis patients, influence analysis), no significant association between  
383 hydroxychloroquine with azithromycin and mortality was found (Table 2). Nevertheless, in our  
384 stratified analysis by continents, we found no significant association with COVID-19 survival risk  
385 among American studies (RR=1.10, 95%CI: 0.91-1.32,  $I^2=0\%$ ,  $P_{\text{heterogeneity within}}=0.48$ ,  $n=3$ ) and  
386 European studies (RR=0.24 (95%CI: 0.00-13.43,  $I^2=80\%$ ,  $P_{\text{heterogeneity within}} < 0.02$ ,  $n=2$ )) but there was a  
387 significant increased risk of mortality in the multiple countries (RR=2.93, 95%CI: 1.79-4.79,  $n=1$ ),  
388 with heterogeneity detected across continent ( $P_{\text{heterogeneity between}}=0.0009$ ).

389

390

### 391 **Discussion**

392 This meta-analysis summarized the results of 14 observational studies, 1 non-randomised study and 1  
393 unpublished randomised controlled trial on hydroxychloroquine with or without azithromycin and  
394 COVID-19 survival (Table 1). The results indicated that hydroxychloroquine with or without  
395 azithromycin is ineffective to reduce COVID-19 mortality risk in hospitalized patients (Figure 2 and  
396 3). Eight observational studies reported no advantage for hydroxychloroquine  
397 (10,11,13,16,20,21,31,32). One US Veterans study identified an increased risk of death(30). Three  
398 Spanish and one Chinese studies reported a protective effect (12,14,15,33) but this benefit on survival  
399 was not replicated in two RCT, especially RECOVERY Trial which is one of the largest study. Our  
400 meta-analysis reported a high heterogeneity. The use of an adjusted effect size to control confusion  
401 bias, the daily HCQ dose, the risk of bias and the localisation of the study (by continents) may explain  
402 one part of the heterogeneity observed according to our subgroup analysis.

403

404 Subgroup analysis revealed that there was a decreased risk of death among 6 European non-  
405 randomised studies, one observation Asian study and for studies which did not specify the treatment  
406 dose. However, five (14,15,21,32,33) of these European studies have a serious or critical risk of bias  
407 (Figure S1). This significant relationship could be explained by a high risk of confusion bias since  
408 these articles did not reported adjusted effect size. These studies also have several biases, such as a  
409 selection bias Gautret et al, control and treatment groups did not come from the same hospital. In 3  
410 Spanish studies (14,15,33), there was no information when treatment were administrated and when the  
411 follow-up began which may lead to a bias in selection. Studies with an adjusted HR in figure S5 and  
412 with a higher quality reported a non-significant higher RR than the other studies. In this meta-analysis,  
413 the majority of the included studies had a high or critical risk of bias (10 out of 16) (Figure S1 and S2).  
414 Most of them do not always report the concomitant use of antiviral or antibacterial drugs. In our  
415 subgroup analysis by study design, we found inconsistent results with a positive but not significant  
416 association between hydroxychloroquine alone and mortality among interventional studies and an  
417 inverse but not significant association among observational studies (Table 2). Heterogeneity between  
418 these subgroups was observed across the study design. However, these findings are limited by the very  
419 low number of interventional studies.

420

421 Two Chinese randomised controlled trial reported no death in both treatment and control group  
422 (38,39) and thus their results were not included in our meta-analysis. A previous review on 8 studies  
423 (11–14,20,30,39,40) on COVID-19 concluded that the level of evidence for hydroxychloroquine effect  
424 is very weak(41). A preprint meta-analysis, using routinely collected records from clinical practice in  
425 Germany, Spain, the UK, Japan, and the USA, compared the use of HCQ vs sulfasalazine (42). This  
426 study observed an increased risk of 30-day cardiovascular mortality (HR=2.19 [1.22-3.94]) but there  
427 was no standard care comparative group. Some previous meta-analyses were also conducted on  
428 hydroxychloroquine and various health endpoints including mortality. However these studies did not  
429 report all the published and unpublished literature, including a very limiting number of studies: from 3  
430 articles(17,18) to 6 articles(19). These previous meta-analyses did not perform subgroup and



431 sensitivity analysis to test the effect of pooling RCT and observational study, neither studying the  
432 source of heterogeneity. They used unadjusted risk ratio (calculated with the number of events in each  
433 group) whereas in our meta-analysis, we used adjusted relative risk (43) and we did sensitivity  
434 analysis on the adjustment of effect size. Statistical adjustments for key prognostic variables allow to  
435 limit confusion bias, especially in observational studies which are not randomised. Our meta-analysis  
436 confirmed the partial preliminary results of these meta-analyses about the absence of effect for HCQ  
437 on survival.

438  
439 Our study has several strengths. To our knowledge, this is the first meta-analysis using adjusted  
440 relative risk and including numerous subgroup analysis (by continent, population age, effect size, risk  
441 of bias, published articles, mean daily dose of hydroxychloroquine, exclusion of cancer and  
442 haemodialysis patients) which found stable and consistent results. This study informs clinicians and  
443 patients regarding the efficiency of HCQ in treating COVID-19. We included several unpublished  
444 papers to minimize the publication bias. Our subgroup analysis by published studies (vs unpublished  
445 studies) identified that the inclusion of preprints did not change the results. Exclusion of grey literature  
446 (unpublished studies, with limited distribution) could lead to an exaggeration of the intervention effect  
447 by 15% (44). There is limited evidence to identify whether grey studies have a poorer methodological  
448 quality than published studies(45). Mortality is a reliable endpoint across studies. Limitations come  
449 from the studies which do not report adjusted effect size when mortality was not the primary endpoint.  
450 Confounding bias is high in these articles (mainly for the preprints). This meta-analysis was based on  
451 aggregated data, without access to original patient data. Most of studies are observational which do not  
452 allow to identify a causal association. This meta-analysis did not include results from the European  
453 DISCOVERY trial and the WHO SOLIDARITY trial (46). To finish, some of the included studies had  
454 very low quality of evidence (missing data, small sample size, confusion bias, bias in classification of  
455 intervention and selection bias) but the exclusion of these articles did not change the results.

456  
457 Few peer-reviewed studies with a comparative group analysed some other endpoints such as  
458 virological clearance, clinical improvement and arrhythmia risks. A recent randomized controlled trial  
459 with 821 asymptomatic participants in contact with a COVID-19 confirmed case, concluded  
460 hydroxychloroquine was not efficient to prevent illness in a prophylactic way (47). However, this trial  
461 had a limitation: only 16 participants had a confirmed positive RT-PCR test. A small French non-  
462 randomised trial identified a higher proportion of negative RT-PCR tests in the HCQ group (21) but  
463 two other RCT did not find any difference between the HCQ and standard care groups for clinical  
464 improvement (38,39).

465  
466 Several studies raised concerns about an increase of the QTc interval with HCQ use in an intensive  
467 care unit (48) and hospitalized patients (11,49). However, this side effect was not found in Tang et al.  
468 RCT. Several national health organisations (US FDA Food and Drug Administration(50), French  
469 Agency for the Safety of Health Products ANSM (51), European Medicine Agency EMA(52)) raised  
470 concerns about using this unapproved drug for COVID-19. ANSM et US FDA removed the  
471 authorization for its use outside of clinical trials. The Indian Council of Medical Research took an  
472 opposite position and recommend chemoprophylaxis with hydroxychloroquine for asymptomatic cases  
473 (53). In an open label, randomised controlled trial with hydroxychloroquine in patient with mild and  
474 moderate symptoms, no death were reported (38). Finally, in the comparative peer-reviewed studies, a  
475 clear conclusion on hydroxychloroquine is not possible due to the small sample size, the lack of well-  
476 performed randomised controlled trials (mainly non-randomised and retrospective studies) and  
477 inconsistent results. Many preprints without comparative group and without randomization bring  
478 confusion in this highly politicised topic. There is a gap between the speed of clinical research and the  
479 expectation of a clear solution to treat COVID-19 patients. Indeed, producing robust clinical trials is  
480 necessarily time-consuming. Results from large RCT are needed to shut down the controversy.

481

482  
483  
484  
485  
486  
487  
488  
489  
490  
491  
492  
493  
494  
495  
496  
497  
498  
499  
500  
501  
502  
503  
504  
505  
506  
507  
508  
509  
510  
511  
512  
513  
514  
515  
516  
517  
518  
519  
520  
521  
522  
523

## Conclusion

In conclusion, there is no strong evidence supporting a benefice for hydroxychloroquine with or without azithromycin to improve survival of COVID-19 hospitalized patients. Conversely, there is no strong evidence supporting an increased mortality associated with HCQ or HCQ + AZ intake.

## References

1. Hill A, Wang J, Levi J, Heath K, Fortunak J. Minimum costs to manufacture new treatments for COVID-19. *J Virus Erad.* 2020 Apr 30;6(2):61–9.
2. DeJong C, Wachter RM. The Risks of Prescribing Hydroxychloroquine for Treatment of COVID-19—First, Do No Harm. *JAMA Intern Med* [Internet]. 2020 Apr 29 [cited 2020 Jun 17]; Available from: <https://jamanetwork.com/journals/jamainternalmedicine/fullarticle/2765360>
3. Maisonnasse. Hydroxychloroquine in the treatment and prophylaxis of SARS-CoV-2 infection in non-human primates. 2020 May 6 [cited 2020 May 30]; Available from: <https://www.researchsquare.com/article/rs-27223/v1>
4. Yao X, Ye F, Zhang M, Cui C, Huang B, Niu P, et al. In Vitro Antiviral Activity and Projection of Optimized Dosing Design of Hydroxychloroquine for the Treatment of Severe Acute Respiratory Syndrome Coronavirus 2 (SARS-CoV-2). *Clin Infect Dis* [Internet]. [cited 2020 May 30]; Available from: <https://academic.oup.com/cid/advance-article/doi/10.1093/cid/ciaa237/5801998>
5. Liu J, Cao R, Xu M, Wang X, Zhang H, Hu H, et al. Hydroxychloroquine, a less toxic derivative of chloroquine, is effective in inhibiting SARS-CoV-2 infection in vitro. *Cell Discovery.* 2020 Mar 18;6(1):1–4.
6. Andreani J, Le Bideau M, Duflot I, Jardot P, Rolland C, Boxberger M, et al. In vitro testing of combined hydroxychloroquine and azithromycin on SARS-CoV-2 shows synergistic effect. *Microb Pathog.* 2020 Apr 25;145:104228.
7. Al-Bari MdAA. Targeting endosomal acidification by chloroquine analogs as a promising strategy for the treatment of emerging viral diseases. *Pharmacol Res Perspect.* 2017 Feb;5(1):e00293.
8. Rosenke K, Jarvis MA, Feldmann F, Schwarz B, Okumura A, Lovaglio J, et al. Hydroxychloroquine Proves Ineffective in Hamsters and Macaques Infected with SARS-CoV-2. *bioRxiv.* 2020 Jun 11;2020.06.10.145144.
9. NIH US National Library of Medicine. *ClinicalTrials.gov* [Internet]. [cited 2020 Jun 17]. Available from: <https://clinicaltrials.gov/ct2/results?cond=hydroxychloroquine+COVID-19&term=&cntry=&state=&city=&dist=>
10. Kuderer NM, Choueiri TK, Shah DP, Shyr Y, Rubinstein SM, Rivera DR, et al. Clinical impact of COVID-19 on patients with cancer (CCC19): a cohort study. *Lancet.* 2020 May 28;
11. Mahévas M, Tran V-T, Roumier M, Chabrol A, Paule R, Guillaud C, et al. Clinical efficacy of hydroxychloroquine in patients with covid-19 pneumonia who require oxygen: observational

- 524 comparative study using routine care data. *BMJ* [Internet]. 2020 May 14 [cited 2020 Jun 8];369.  
525 Available from: <https://www.bmj.com/content/369/bmj.m1844>
- 526 12. Yu B, Li C, Chen P, Zhou N, Wang L, Li J, et al. Low dose of hydroxychloroquine reduces fatality  
527 of critically ill patients with. *Sci China Life Sci*. 2020 May 15;1–7.
- 528 13. Geleris J, Sun Y, Platt J, Zucker J, Baldwin M, Hripcsak G, et al. Observational Study of  
529 Hydroxychloroquine in Hospitalized Patients with Covid-19. *N Engl J Med*. 2020 May 7;
- 530 14. Membrillo FJ, Ramírez-Olivencia G, Estébanez M, Dios B de, Herrero MD, Mata T, et al. Early  
531 Hydroxychloroquine Is Associated with an Increase of Survival in COVID-19 Patients: An  
532 Observational Study. 2020 May 9 [cited 2020 Jun 8]; Available from:  
533 <https://www.preprints.org/manuscript/202005.0057/v2>
- 534 15. Ayerbe L, Risco C, Ayis S. The association between treatment with heparin and survival in  
535 patients with Covid-19. *J Thromb Thrombolysis*. 2020 May 31;1–4.
- 536 16. Rosenberg ES, Dufort EM, Udo T, Wilberschied LA, Kumar J, Tesoriero J, et al. Association of  
537 Treatment With Hydroxychloroquine or Azithromycin With In-Hospital Mortality in Patients  
538 With COVID-19 in New York State. *JAMA*. 2020 May 11;
- 539 17. Singh AK, Singh A, Singh R, Misra A. “Hydroxychloroquine in patients with COVID-19: A  
540 Systematic Review and meta-analysis.”. *Diabetes Metab Syndr*. 2020 May 12;14(4):589–96.
- 541 18. Sarma P, Kaur H, Kumar H, Mahendru D, Avti P, Bhattacharyya A, et al. Virological and clinical  
542 cure in COVID-19 patients treated with hydroxychloroquine: A systematic review and meta-  
543 analysis. *J Med Virol*. 2020 Jul;92(7):776–85.
- 544 19. Patel TK, Barvaliya M, Kevadiya BD, Patel PB, Bhalla HL. Does Adding of Hydroxychloroquine to  
545 the Standard Care Provide any Benefit in Reducing the Mortality among COVID-19 Patients?: a  
546 Systematic Review. *J Neuroimmune Pharmacol*. 2020 Jun 9;
- 547 20. Barbosa Joshua, Kaitis Daniel, Freedman Ryan, Le Kim, Lin Xihui. Clinical Outcomes of  
548 Hydroxychloroquine in Hospitalized Patients with COVID-19: a Quasi-Randomized Comparative  
549 Study [Internet]. Dropbox. 2020 [cited 2020 Jun 8]. Available from:  
550 [https://www.dropbox.com/s/urzapkyij542qx5/NEJM\\_Clinical%20Outcomes%20of%20Hydroxyc  
551 hloroquine%20in%20Patients%20with%20COVID19.pdf.pdf.pdf.pdf.pdf.pdf.pdf?dl=0](https://www.dropbox.com/s/urzapkyij542qx5/NEJM_Clinical%20Outcomes%20of%20Hydroxyc%20hloroquine%20in%20Patients%20with%20COVID19.pdf.pdf.pdf.pdf.pdf.pdf.pdf?dl=0)
- 552 21. Gautret P, Lagier J-C, Parola P, Hoang VT, Meddeb L, Mailhe M, et al. Hydroxychloroquine and  
553 azithromycin as a treatment of COVID-19: results of an open-label non-randomized clinical trial.  
554 *International Journal of Antimicrobial Agents*. 2020 Mar 20;105949.
- 555 22. Balduzzi S, Rücker G, Schwarzer G. How to perform a meta-analysis with R: a practical tutorial.  
556 *Evid Based Ment Health*. 2019 Nov;22(4):153–60.
- 557 23. The Cochrane Collaboration. Box 9.2.a: Calculation of RR, OR and RD [Internet]. *Cochrane*  
558 *Handbook for Systematic Reviews of Interventions*. Part 2: General methods for Cochrane  
559 reviews. [cited 2020 Jun 10]. Available from: [https://handbook-5-  
560 1.cochrane.org/chapter\\_9/box\\_9\\_2\\_a\\_calculation\\_of\\_risk\\_ratio\\_rr\\_odds\\_ratio\\_or\\_and.htm](https://handbook-5-1.cochrane.org/chapter_9/box_9_2_a_calculation_of_risk_ratio_rr_odds_ratio_or_and.htm)
- 561 24. Sterne JA, Hernán MA, Reeves BC, Savović J, Berkman ND, Viswanathan M, et al. ROBINS-I: a  
562 tool for assessing risk of bias in non-randomised studies of interventions. *BMJ* [Internet]. 2016  
563 Oct 12 [cited 2020 Jun 8];355. Available from: <https://www.bmj.com/content/355/bmj.i4919>

- 564 25. Sterne JAC, Savović J, Page MJ, Elbers RG, Blencowe NS, Boutron I, et al. RoB 2: a revised tool  
565 for assessing risk of bias in randomised trials. *BMJ* [Internet]. 2019 Aug 28 [cited 2020 Jun  
566 8];366. Available from: <https://www.bmj.com/content/366/bmj.l4898>
- 567 26. DerSimonian R, Laird N. Meta-analysis in clinical trials. *Controlled Clinical Trials*. 1986 Sep  
568 1;7(3):177–88.
- 569 27. Begg CB, Mazumdar M. Operating characteristics of a rank correlation test for publication bias.  
570 *Biometrics*. 1994 Dec;50(4):1088–101.
- 571 28. Viechtbauer W, Cheung MW-L. Outlier and influence diagnostics for meta-analysis. *Res Synth  
572 Method*. 2010 Apr;1(2):112–25.
- 573 29. McGuinness LA, Higgins JPT. Risk-of-bias VISualization (robvis): An R package and Shiny web app  
574 for visualizing risk-of-bias assessments. *Res Synth Methods*. 2020 Apr 26;
- 575 30. Magagnoli J, Narendran S, Pereira F, Cummings TH, Hardin JW, Sutton SS, et al. Outcomes of  
576 hydroxychloroquine usage in United States veterans hospitalized with COVID-19. *Med  
577* [Internet]. 2020 Jun 5 [cited 2020 Jun 8];0(0). Available from:  
578 [https://www.cell.com/med/abstract/S2666-6340\(20\)30006-4](https://www.cell.com/med/abstract/S2666-6340(20)30006-4)
- 579 31. Ip A, Berry DA, Hansen E, Goy AH, Pecora AL, Sinclair BA, et al. Hydroxychloroquine and  
580 Tocilizumab Therapy in COVID-19 Patients - An Observational Study [Internet]. *Infectious  
581 Diseases (except HIV/AIDS)*; 2020 May [cited 2020 Jun 8]. Available from:  
582 <http://medrxiv.org/lookup/doi/10.1101/2020.05.21.20109207>
- 583 32. Alberici F, Delbarba E, Manenti C, Econimo L, Valerio F, Pola A, et al. A report from the Brescia  
584 Renal COVID Task Force on the clinical characteristics and short-term outcome of hemodialysis  
585 patients with SARS-CoV-2 infection. *Kidney Int*. 2020 May 8;
- 586 33. Sánchez-Álvarez JE, Fontán MP, Martín CJ, Pelicano MB, Reina CJC, Prieto ÁMS, et al. Status of  
587 SARS-CoV-2 infection in patients on renal replacement therapy. Report of the COVID-19  
588 Registry of the Spanish Society of Nephrology (SEN). *Nefrología (English Edition)* [Internet].  
589 2020 Apr 27 [cited 2020 Jun 8]; Available from:  
590 <http://www.sciencedirect.com/science/article/pii/S201325142030050X>
- 591 34. Wilkinson E. RECOVERY trial: the UK covid-19 study resetting expectations for clinical trials. *BMJ  
592* [Internet]. 2020 Apr 28 [cited 2020 Jun 16];369. Available from:  
593 <https://www.bmj.com/content/369/bmj.m1626>
- 594 35. Rogado J, Obispo B, Pangua C, Serrano-Montero G, Martín Marino A, Pérez-Pérez M, et al.  
595 Covid-19 transmission, outcome and associated risk factors in cancer patients at the first  
596 month of the pandemic in a Spanish hospital in Madrid. *Clin Transl Oncol*. 2020 May 25;1–5.
- 597 36. Singh S, Khan A, Chowdhry M, Chatterjee A. Outcomes of Hydroxychloroquine Treatment  
598 Among Hospitalized COVID-19 Patients in the United States- Real-World Evidence From a  
599 Federated Electronic Medical Record Network [Internet]. *Infectious Diseases (except HIV/AIDS)*;  
600 2020 May [cited 2020 Jun 8]. Available from:  
601 <http://medrxiv.org/lookup/doi/10.1101/2020.05.12.20099028>
- 602 37. RECOVERY TRIAL. No clinical benefit from use of hydroxychloroquine in hospitalised patients  
603 with COVID-19 — RECOVERY Trial [Internet]. [cited 2020 Jun 8]. Available from:  
604 <https://www.recoverytrial.net/news/statement-from-the-chief-investigators-of-the->

- 605 randomised-evaluation-of-covid-19-therapy-recovery-trial-on-hydroxychloroquine-5-june-  
606 2020-no-clinical-benefit-from-use-of-hydroxychloroquine-in-hospitalised-patients-with-covid-  
607 19
- 608 38. Tang W, Cao Z, Han M, Wang Z, Chen J, Sun W, et al. Hydroxychloroquine in patients with  
609 mainly mild to moderate coronavirus disease 2019: open label, randomised controlled trial.  
610 BMJ [Internet]. 2020 May 14 [cited 2020 Jun 8];369. Available from:  
611 <https://www.bmj.com/content/369/bmj.m1849>
- 612 39. CHEN Jun LD, CHEN Jun LD. A pilot study of hydroxychloroquine in treatment of patients with  
613 moderate COVID-19. *J Zhejiang Univ (Med Sci)*. 2020 Mar 6;49(2):215–9.
- 614 40. Mallat J, Hamed F, Balkis M, Mohamed MA, Mooty M, Malik A, et al. Hydroxychloroquine is  
615 associated with slower viral clearance in clinical COVID-19 patients with mild to moderate  
616 disease: A retrospective study. medRxiv. 2020 May 2;2020.04.27.20082180.
- 617 41. Hernandez AV, Roman YM, Pasupuleti V, Barboza JJ, White CM. Hydroxychloroquine or  
618 Chloroquine for Treatment or Prophylaxis of COVID-19: A Living Systematic Review. *Ann Intern*  
619 *Med*. 2020 May 27;
- 620 42. Lane JCE, Weaver J, Kostka K, Duarte-Salles T, Abrahao MTF, Alghoul H, et al. Safety of  
621 hydroxychloroquine, alone and in combination with azithromycin, in light of rapid wide-spread  
622 use for COVID-19: a multinational, network cohort and self-controlled case series study  
623 [Internet]. *Rheumatology*; 2020 Apr [cited 2020 Jun 15]. Available from:  
624 <http://medrxiv.org/lookup/doi/10.1101/2020.04.08.20054551>
- 625 43. Guyatt GH, Oxman AD, Vist G, Kunz R, Brozek J, Alonso-Coello P, et al. GRADE guidelines: 4.  
626 Rating the quality of evidence—study limitations (risk of bias). *Journal of Clinical Epidemiology*.  
627 2011 Apr 1;64(4):407–15.
- 628 44. McAuley L, Pham B, Tugwell P, Moher D. Does the inclusion of grey literature influence  
629 estimates of intervention effectiveness reported in meta-analyses? *The Lancet*. 2000 Oct  
630 7;356(9237):1228–31.
- 631 45. Hopewell S, McDonald S, Clarke MJ, Egger M. Grey literature in meta-analyses of randomized  
632 trials of health care interventions. *Cochrane Database of Systematic Reviews* [Internet]. 2007  
633 [cited 2020 Jun 12];(2). Available from:  
634 <https://www.cochranelibrary.com/cdsr/doi/10.1002/14651858.MR000010.pub3/full>
- 635 46. WHO (World Health Organization). “Solidarity” clinical trial for COVID-19 treatments [Internet].  
636 [cited 2020 Jun 8]. Available from: [https://www.who.int/emergencies/diseases/novel-](https://www.who.int/emergencies/diseases/novel-coronavirus-2019/global-research-on-novel-coronavirus-2019-ncov/solidarity-clinical-trial-for-covid-19-treatments)  
637 [coronavirus-2019/global-research-on-novel-coronavirus-2019-ncov/solidarity-clinical-trial-for-](https://www.who.int/emergencies/diseases/novel-coronavirus-2019/global-research-on-novel-coronavirus-2019-ncov/solidarity-clinical-trial-for-covid-19-treatments)  
638 [covid-19-treatments](https://www.who.int/emergencies/diseases/novel-coronavirus-2019/global-research-on-novel-coronavirus-2019-ncov/solidarity-clinical-trial-for-covid-19-treatments)
- 639 47. Boulware DR, Pullen MF, Bangdiwala AS, Pastick KA, Lofgren SM, Okafor EC, et al. A  
640 Randomized Trial of Hydroxychloroquine as Postexposure Prophylaxis for Covid-19. *New*  
641 *England Journal of Medicine*. 2020 Jun 3;0(0):null.
- 642 48. Bessière F, Rocca H, Delinière A, Charrière R, Chevalier P, Argaud L, et al. Assessment of QT  
643 Intervals in a Case Series of Patients With Coronavirus Disease 2019 (COVID-19) Infection  
644 Treated With Hydroxychloroquine Alone or in Combination With Azithromycin in an Intensive  
645 Care Unit. *JAMA Cardiol* [Internet]. 2020 May 1 [cited 2020 Jun 8]; Available from:  
646 <https://jamanetwork.com/journals/jamacardiology/fullarticle/2765633>

- 647 49. Mercurio NJ, Yen CF, Shim DJ, Maher TR, McCoy CM, Zimetbaum PJ, et al. Risk of QT Interval  
648 Prolongation Associated With Use of Hydroxychloroquine With or Without Concomitant  
649 Azithromycin Among Hospitalized Patients Testing Positive for Coronavirus Disease 2019  
650 (COVID-19). *JAMA Cardiol* [Internet]. 2020 May 1 [cited 2020 Jun 8]; Available from:  
651 <https://jamanetwork.com/journals/jamacardiology/fullarticle/2765631>
- 652 50. Commissioner O of the. Coronavirus (COVID-19) Update: FDA Revokes Emergency Use  
653 Authorization for Chloroquine and Hydroxychloroquine [Internet]. FDA. FDA; 2020 [cited 2020  
654 Jun 15]. Available from: [https://www.fda.gov/news-events/press-announcements/coronavirus-](https://www.fda.gov/news-events/press-announcements/coronavirus-covid-19-update-fda-revokes-emergency-use-authorization-chloroquine-and)  
655 [covid-19-update-fda-revokes-emergency-use-authorization-chloroquine-and](https://www.fda.gov/news-events/press-announcements/coronavirus-covid-19-update-fda-revokes-emergency-use-authorization-chloroquine-and)
- 656 51. Agence Nationale de Sécurité du médicament et des produits de santé (ANSM). COVID-19 :  
657 l'ANSM souhaite suspendre par précaution les essais cliniques évaluant l'hydroxychloroquine  
658 dans la prise en charge des patients - Point d'Information - ANSM : Agence nationale de  
659 sécurité du médicament et des produits de santé [Internet]. [cited 2020 Jun 15]. Available from:  
660 [https://ansm.sante.fr/S-informer/Points-d-information-Points-d-information/COVID-19-l-](https://ansm.sante.fr/S-informer/Points-d-information-Points-d-information/COVID-19-l-ANSM-souhaite-suspendre-par-precaution-les-essais-cliniques-evaluant-l-hydroxychloroquine-dans-la-prise-en-charge-des-patients-Point-d-Information)  
661 [ANSM-souhaite-suspendre-par-precaution-les-essais-cliniques-evaluant-l-hydroxychloroquine-](https://ansm.sante.fr/S-informer/Points-d-information-Points-d-information/COVID-19-l-ANSM-souhaite-suspendre-par-precaution-les-essais-cliniques-evaluant-l-hydroxychloroquine-dans-la-prise-en-charge-des-patients-Point-d-Information)  
662 [dans-la-prise-en-charge-des-patients-Point-d-Information](https://ansm.sante.fr/S-informer/Points-d-information-Points-d-information/COVID-19-l-ANSM-souhaite-suspendre-par-precaution-les-essais-cliniques-evaluant-l-hydroxychloroquine-dans-la-prise-en-charge-des-patients-Point-d-Information)
- 663 52. DIMITROVA EK. COVID-19: reminder of risk serious side effects with chloroquine and  
664 hydroxychloroquine [Internet]. European Medicines Agency. 2020 [cited 2020 Jun 15]. Available  
665 from: [https://www.ema.europa.eu/en/news/covid-19-reminder-risk-serious-side-effects-](https://www.ema.europa.eu/en/news/covid-19-reminder-risk-serious-side-effects-chloroquine-hydroxychloroquine)  
666 [chloroquine-hydroxychloroquine](https://www.ema.europa.eu/en/news/covid-19-reminder-risk-serious-side-effects-chloroquine-hydroxychloroquine)
- 667 53. Rathi S, Ish P, Kalantri A, Kalantri S. Hydroxychloroquine prophylaxis for COVID-19 contacts in  
668 India. *The Lancet Infectious Diseases* [Internet]. 2020 Apr 17 [cited 2020 Jun 15];0(0). Available  
669 from: [https://www.thelancet.com/journals/laninf/article/PIIS1473-3099\(20\)30313-3/abstract](https://www.thelancet.com/journals/laninf/article/PIIS1473-3099(20)30313-3/abstract)

670  
671  
672  
673  
674  
675  
676  
677  
678  
679  
680  
681  
682

### 683 **List of figures and tables**

684 Figure 1: Flow diagram of study selection process

685 Figure 2: Meta-analysis showing association between hydroxychloroquine alone and COVID-19 mortality  
686 (observational vs intervention)

687 Figure 3: Meta-analysis showing association between hydroxychloroquine with azithromycin and COVID-19  
688 mortality.

689  
690 Table 1: Characteristics of studies included in the meta-analysis for COVID-19 mortality

691 Table 2: Subgroup analysis for the associations between HCQ alone or HCQ+AZI and mortality risk of patients  
692 with COVID-19 (observational and interventional studies)

693  
694

695 **Supplementary tables and figures**

696 Supplementary tables and figures

697 S1 Fig. Summary of risk of bias analysis for non-randomised studies (ROBIN-I)

698 S2 Fig Assessment of quality of studies using ROBIN-I for non-randomised studies.

699 S3 Fig.: Funnel plot for hydroxychloroquine alone and COVID-19 mortality risk

700 S4 Fig. Forest plot for hydroxychloroquine alone and COVID-19 mortality risk, subgroup analysis per risk of bias

702 S5 Fig. Forest plot for hydroxychloroquine alone and COVID-19 mortality risk, subgroup analysis per continent

703 S6 Fig. Forest plot for hydroxychloroquine alone and COVID-19 mortality risk, subgroup analysis per hydroxychloroquine dose

705 S7 Fig. Influence analysis for hydroxychloroquine and COVID-19 mortality

706

707 S1. Full electronic search strategy

708 S2: PRISMA Checklist

709 S1 Table. Subgroup analysis for the associations between HCQ+AZI and mortality risk of patients with COVID-19 (observational studies)

711

712

713

714

715 Figure S1: Summary of risk of bias analysis for non-randomised studies (ROBIN-I)

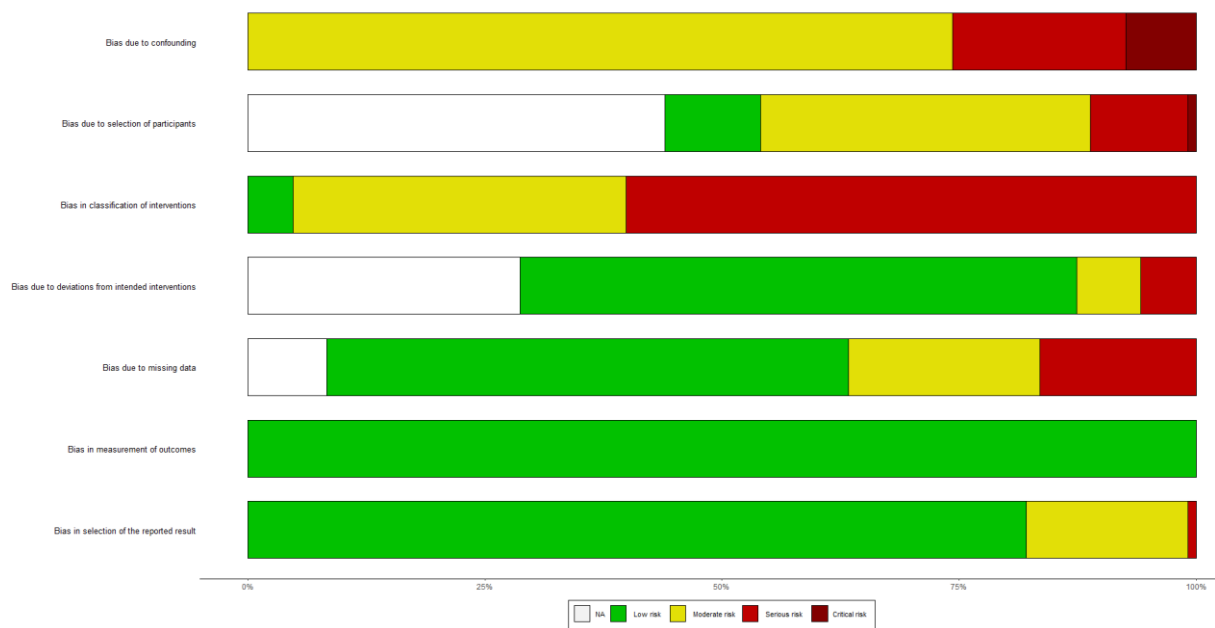

716

717

718

719

720

721

722

723

724

725

726

727

728

729 Figure S2: Assessment of quality of studies using ROBINS-I for non-randomised studies.

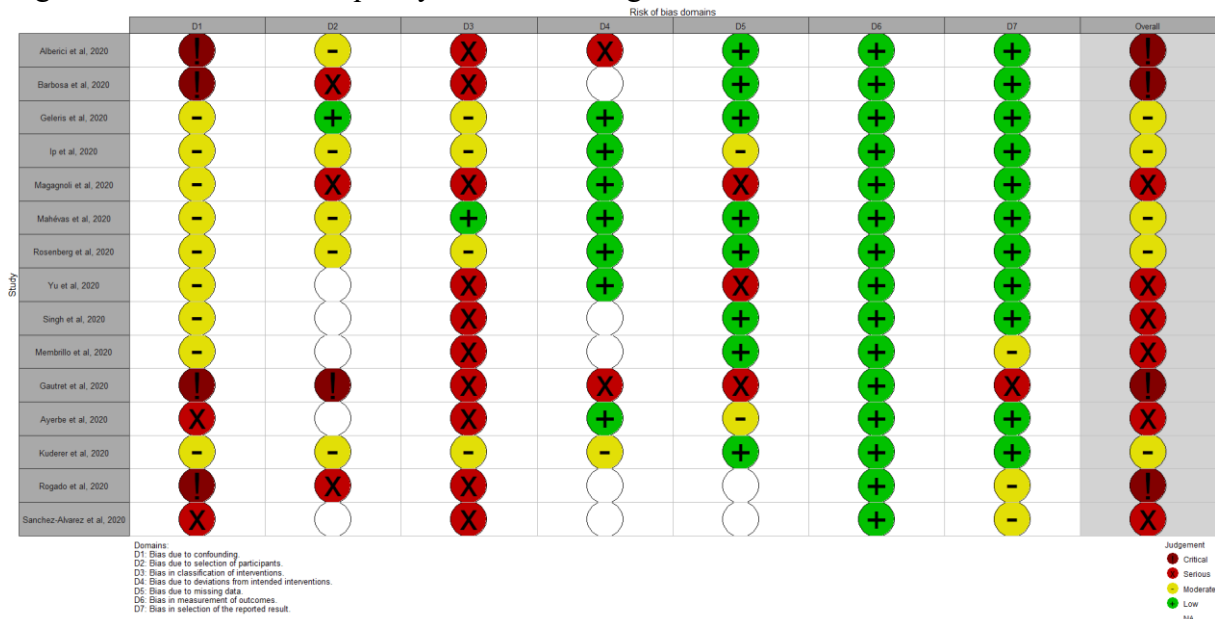

730  
731  
732  
733  
734  
735  
736  
737  
738  
739  
740  
741  
742  
743  
744  
745  
746  
747  
748  
749  
750  
751  
752  
753  
754  
755  
756  
757  
758  
759  
760



761 Figure S3: Funnel plot for hydroxychloroquine alone and COVID-19 mortality risk

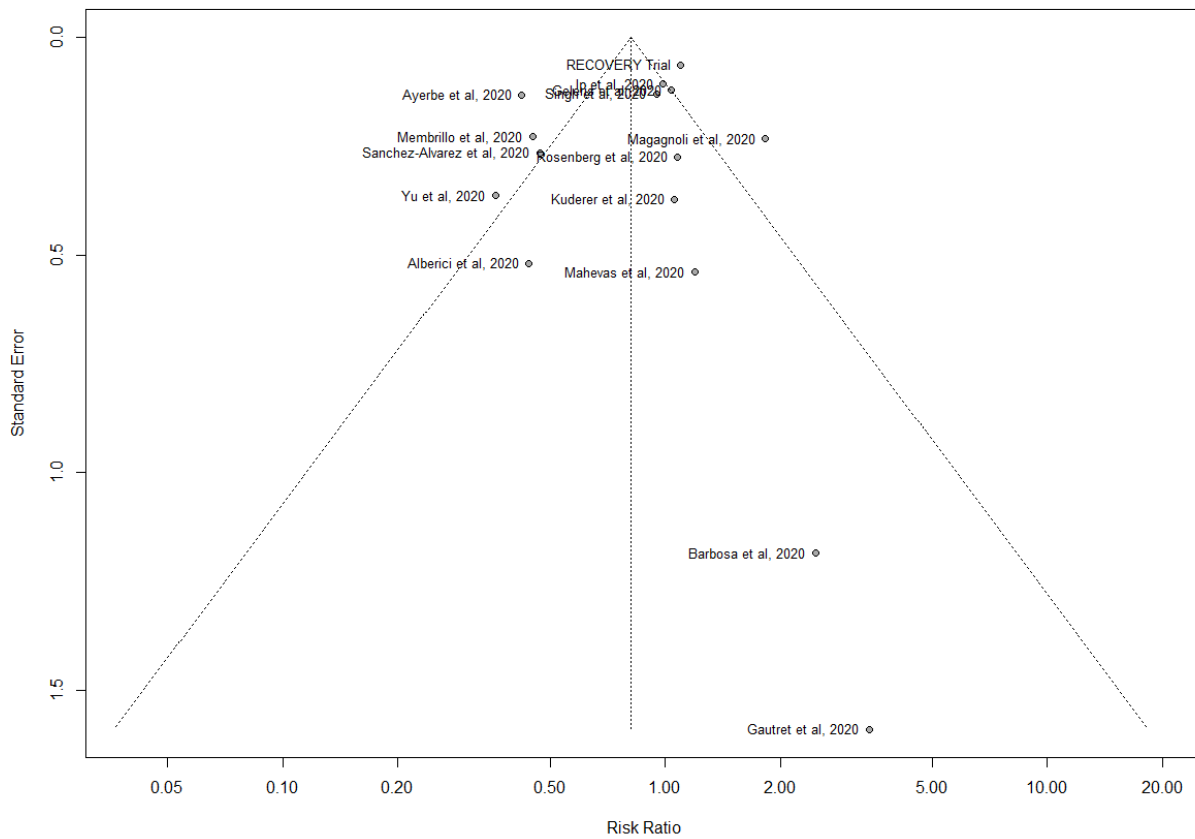

762  
763  
764  
765  
766  
767  
768  
769  
770  
771  
772  
773  
774  
775  
776  
777  
778

779 Figure S4: Forest plot for hydroxychloroquine alone and COVID-19 mortality risk, subgroup  
 780 analysis per risk of bias

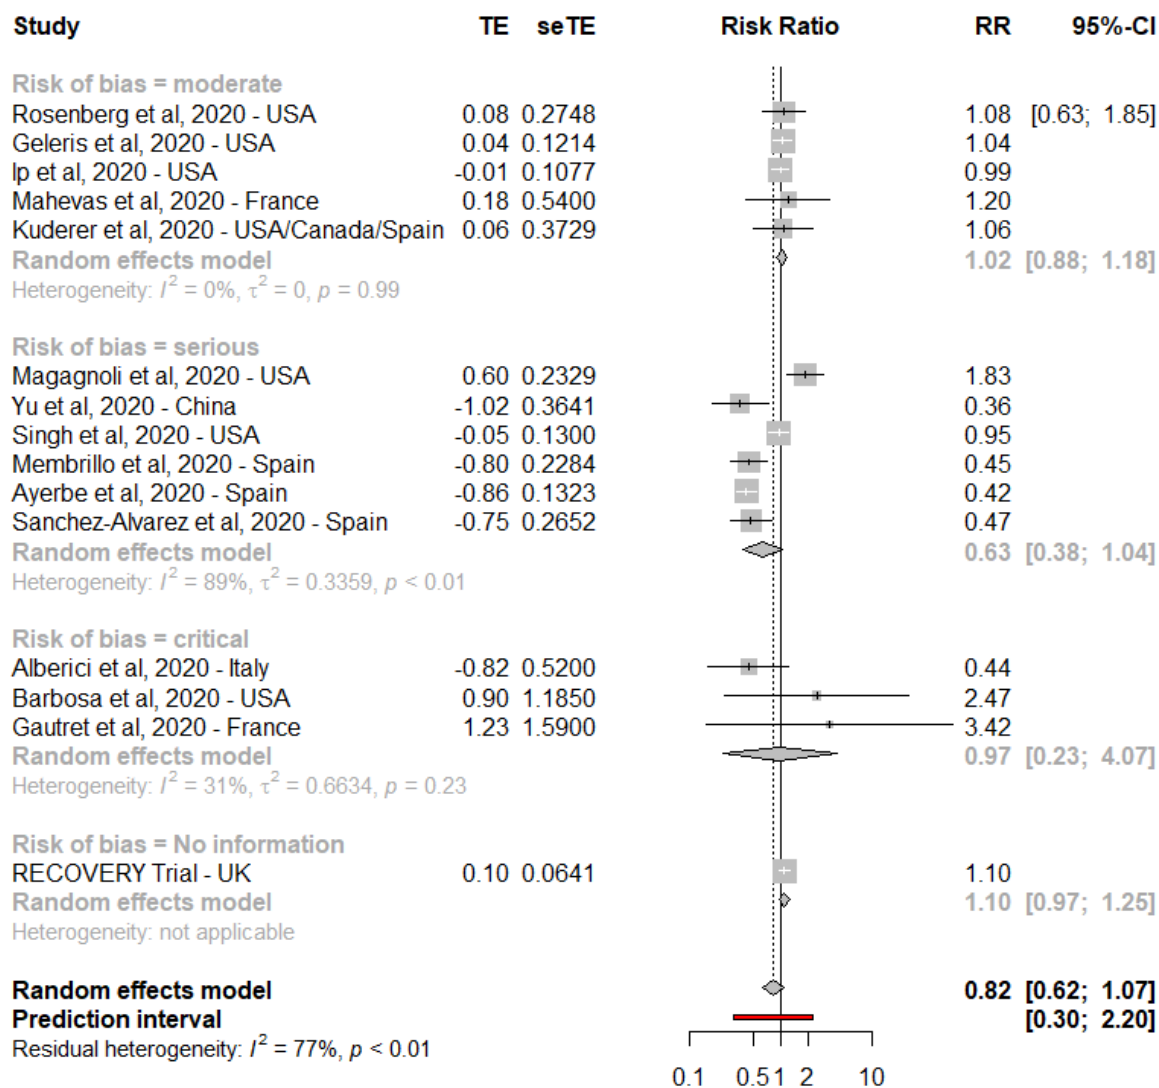

781  
 782  
 783  
 784  
 785  
 786  
 787  
 788  
 789  
 790  
 791  
 792  
 793  
 794  
 795  
 796

797 Figure S5: Forest plot for hydroxychloroquine alone and COVID-19 mortality risk, subgroup  
798 analysis per continent

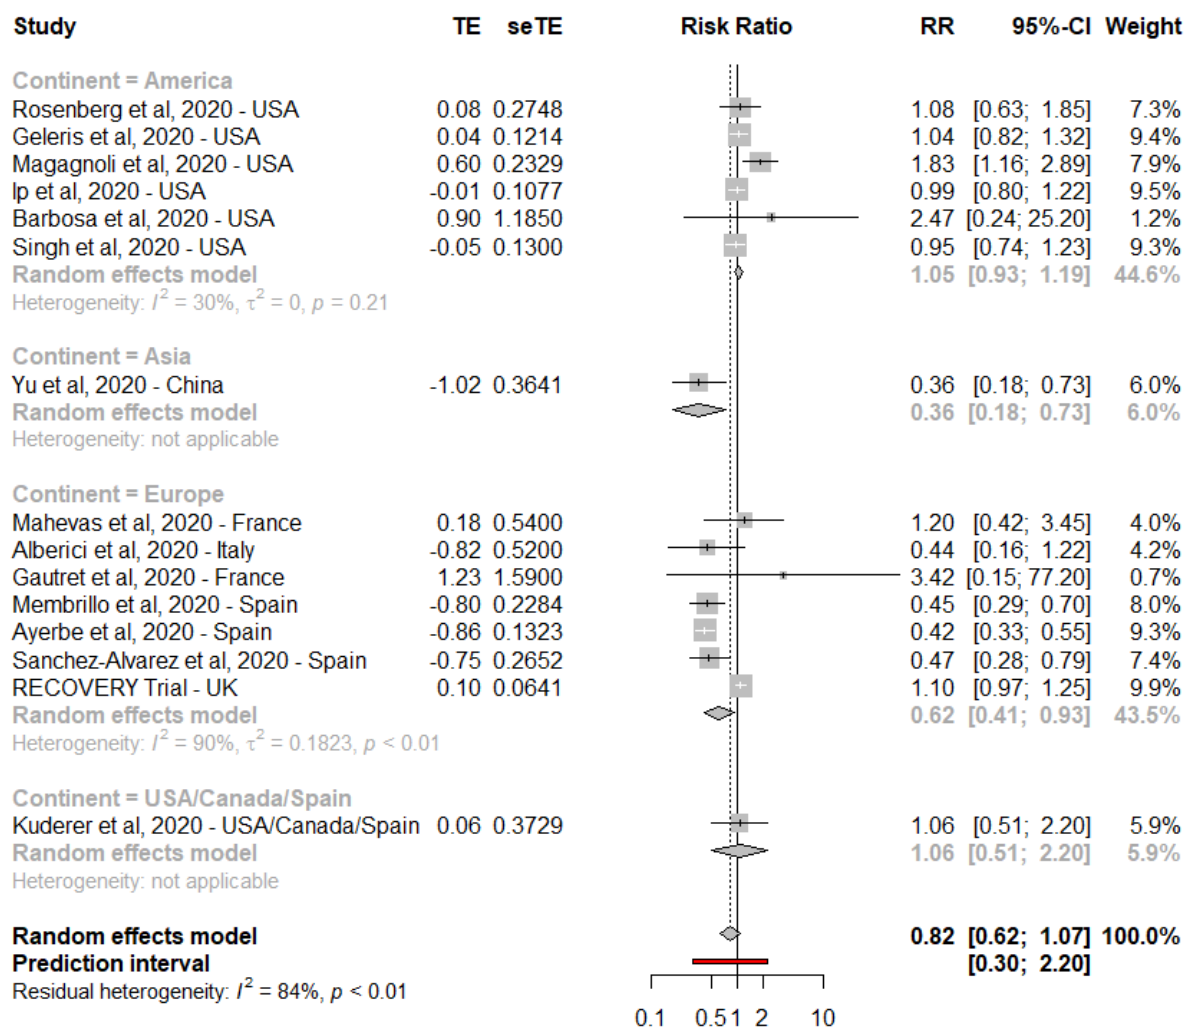

799  
800  
801  
802  
803  
804  
805  
806  
807  
808  
809  
810  
811  
812  
813  
814  
815  
816

817 Figure S6: Forest plot for hydroxychloroquine alone and COVID-19 mortality risk, subgroup  
 818 analysis per hydroxychloroquine dose  
 819

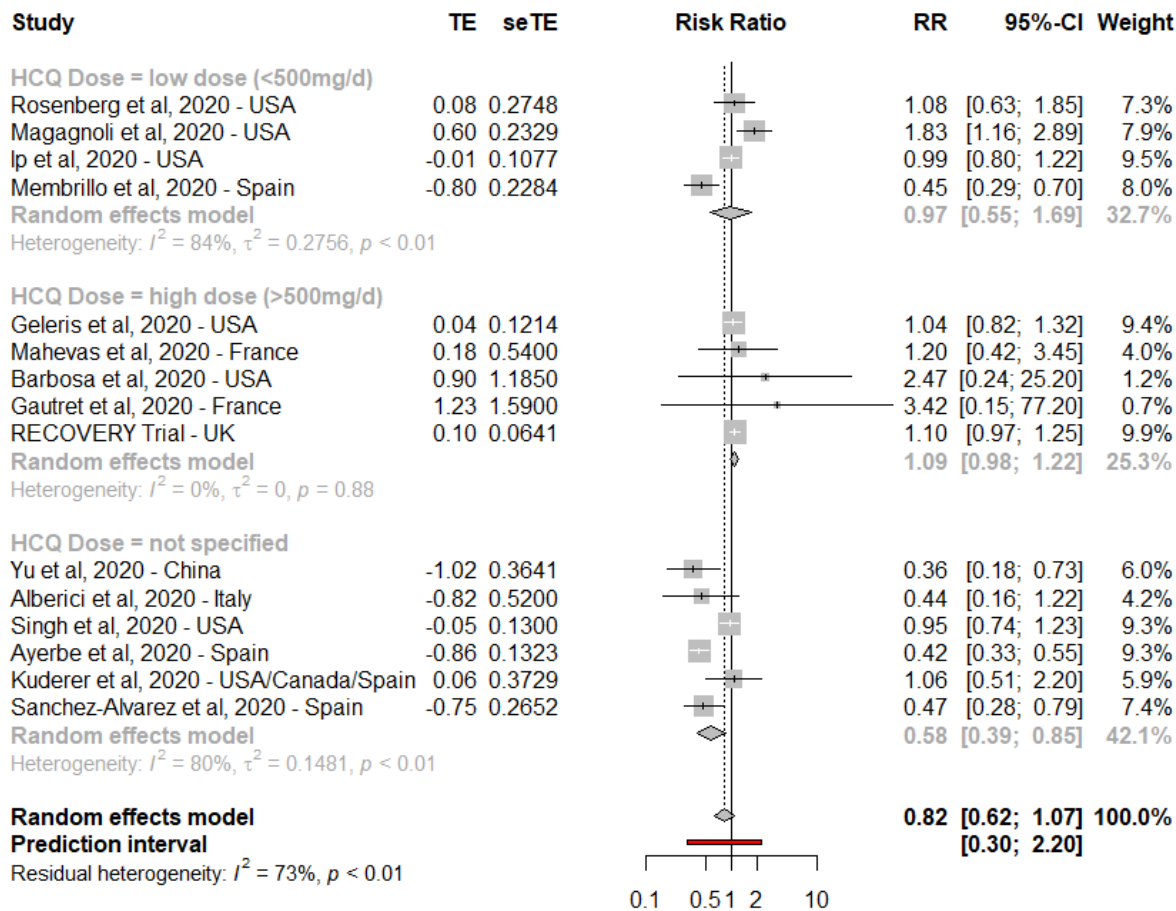

820  
 821  
 822  
 823  
 824  
 825  
 826  
 827  
 828  
 829  
 830  
 831  
 832  
 833  
 834  
 835  
 836  
 837  
 838  
 839  
 840

841 Figure S7: Influence analysis for hydroxychloroquine and COVID-19 mortality

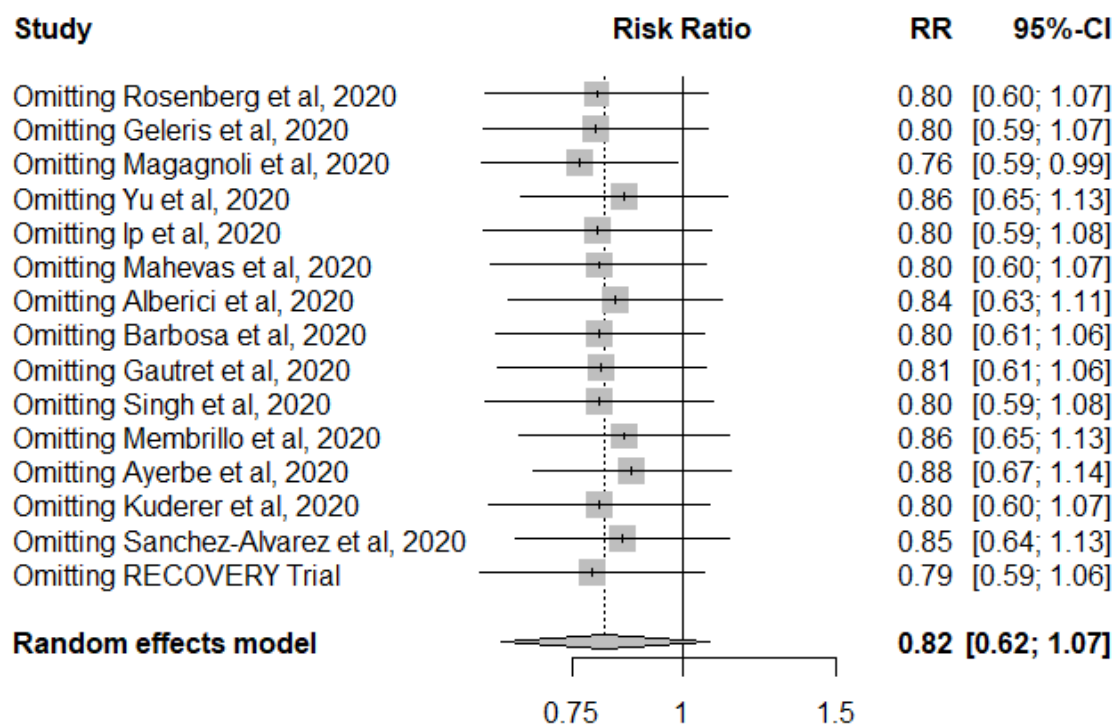

842  
843  
844  
845  
846  
847  
848  
849  
850  
851  
852  
853  
854  
855  
856  
857  
858  
859

860

861 S1. Full electronic search strategy

862

863 **Cochrane Library**

864 Website: <https://www.cochranelibrary.com/advanced-search>

865 Cochrane Review matching (Hydroxychloroquine or HCQ) in Title Abstract Keyword AND

866 (mortality or death) in Title Abstract Keyword AND (COVID-19 or SRAS-CoV-2) in Title Abstract

867 Keyword - (Word variations have been searched)

868

869 **PubMed**

870 Website:

871 [https://pubmed.ncbi.nlm.nih.gov/pubmed/?term=\(hydroxychloroquine+or+HCQ\)+AND+\(COVID-](https://pubmed.ncbi.nlm.nih.gov/pubmed/?term=(hydroxychloroquine+or+HCQ)+AND+(COVID-19+OR+SARS-CoV-2+OR+coronavirus)+AND+(Mortality+OR+death))

872 [19+OR+SARS-CoV-2+OR+coronavirus\)+AND+\(Mortality+OR+death\)](https://pubmed.ncbi.nlm.nih.gov/pubmed/?term=(hydroxychloroquine+or+HCQ)+AND+(COVID-19+OR+SARS-CoV-2+OR+coronavirus)+AND+(Mortality+OR+death))

873 ((hydroxychloroquine or HCQ) AND (COVID-19 OR SARS-CoV-2 OR coronavirus) AND (Mortality

874 OR death)

875

876 **Web of Science**

877 Website:

878 [http://apps.webofknowledge.com.proxy.insermbiblio.inist.fr/Search.do?product=UA&SID=F6KgcWI](http://apps.webofknowledge.com.proxy.insermbiblio.inist.fr/Search.do?product=UA&SID=F6KgcWI7K6kjXJwhAoH&search_mode=GeneralSearch&prID=9a27b347-ecf8-4832-9206-db1bbd2cc9a8)

879 [7K6kjXJwhAoH&search\\_mode=GeneralSearch&prID=9a27b347-ecf8-4832-9206-db1bbd2cc9a8](http://apps.webofknowledge.com.proxy.insermbiblio.inist.fr/Search.do?product=UA&SID=F6KgcWI7K6kjXJwhAoH&search_mode=GeneralSearch&prID=9a27b347-ecf8-4832-9206-db1bbd2cc9a8)

880 You searched for: TOPIC: (covid-19 OR SRAS-CoV-2) AND TOPIC: (hydroxychloroquine or HCQ)

881 AND TOPIC: (mortality or death)

882

883 **Manual additional searches:**

884 **MedRxiv**

885 <https://www.medrxiv.org/>

886 Search: Hydroxychloroquine COVID-19 mortality

887 **Google scholar:**

888 [https://scholar.google.com/scholar?hl=en&as\\_sdt=0%2C5&q=hydroxychloroquine+COVID-](https://scholar.google.com/scholar?hl=en&as_sdt=0%2C5&q=hydroxychloroquine+COVID-19&btnG=)

889 [19&btnG=](https://scholar.google.com/scholar?hl=en&as_sdt=0%2C5&q=hydroxychloroquine+COVID-19&btnG=)

890 Search: Hydroxychloroquine COVID-19 mortality

891

892

893

894

895

896

897

898

899

900

901

902

903 S2. PRISMA Checklist

904

| Section/topic             | #  | Checklist item                                                                                                                                                                                                                                                                                              | Reported on page #            |
|---------------------------|----|-------------------------------------------------------------------------------------------------------------------------------------------------------------------------------------------------------------------------------------------------------------------------------------------------------------|-------------------------------|
| <b>TITLE</b>              |    |                                                                                                                                                                                                                                                                                                             |                               |
| Title                     | 1  | Identify the report as a systematic review, meta-analysis, or both.                                                                                                                                                                                                                                         | p.1                           |
| <b>ABSTRACT</b>           |    |                                                                                                                                                                                                                                                                                                             |                               |
| Structured summary        | 2  | Provide a structured summary including, as applicable: background; objectives; data sources; study eligibility criteria, participants, and interventions; study appraisal and synthesis methods; results; limitations; conclusions and implications of key findings; systematic review registration number. | p.2                           |
| <b>INTRODUCTION</b>       |    |                                                                                                                                                                                                                                                                                                             |                               |
| Rationale                 | 3  | Describe the rationale for the review in the context of what is already known.                                                                                                                                                                                                                              | p.3<br>Lines 110-138          |
| Objectives                | 4  | Provide an explicit statement of questions being addressed with reference to participants, interventions, comparisons, outcomes, and study design (PICOS).                                                                                                                                                  | p.3<br>Lines 139-141          |
| <b>METHODS</b>            |    |                                                                                                                                                                                                                                                                                                             |                               |
| Protocol and registration | 5  | Indicate if a review protocol exists, if and where it can be accessed (e.g., Web address), and, if available, provide registration information including registration number.                                                                                                                               | 3<br>Line 154                 |
| Eligibility criteria      | 6  | Specify study characteristics (e.g., PICOS, length of follow-up) and report characteristics (e.g., years considered, language, publication status) used as criteria for eligibility, giving rationale.                                                                                                      | p.4<br>Lines 170-187          |
| Information sources       | 7  | Describe all information sources (e.g., databases with dates of coverage, contact with study authors to identify additional studies) in the search and date last searched.                                                                                                                                  | p.3<br>Lines 146-152          |
| Search                    | 8  | Present full electronic search strategy for at least one database, including any limits used, such that it could be repeated.                                                                                                                                                                               | p.3 lines 147-152<br>p.29 S1. |
| Study selection           | 9  | State the process for selecting studies (i.e., screening, eligibility, included in systematic review, and, if applicable, included in the meta-analysis).                                                                                                                                                   | p.4 lines 159-164             |
| Data collection process   | 10 | Describe method of data extraction from reports (e.g., piloted forms, independently, in duplicate) and any processes for obtaining and confirming data from investigators.                                                                                                                                  | p.4 lines 166-169             |
| Data items                | 11 | List and define all variables for which data were sought (e.g., PICOS, funding sources) and any assumptions and simplifications made.                                                                                                                                                                       | p.4 lines 170-186             |

|                                    |          |                                                                                                                                                                                                                        |                                                         |
|------------------------------------|----------|------------------------------------------------------------------------------------------------------------------------------------------------------------------------------------------------------------------------|---------------------------------------------------------|
| Risk of bias in individual studies | 12       | Describe methods used for assessing risk of bias of individual studies (including specification of whether this was done at the study or outcome level), and how this information is to be used in any data synthesis. | p.4 lines 184-186                                       |
| Summary measures                   | 13       | State the principal summary measures (e.g., risk ratio, difference in means).                                                                                                                                          | p.4 lines 171-183                                       |
| Synthesis of results               | 14       | Describe the methods of handling data and combining results of studies, if done, including measures of consistency (e.g., $I^2$ ) for each meta-analysis.                                                              | p.4-5 lines                                             |
| <b>Section/topic</b>               | <b>#</b> | <b>Checklist item</b>                                                                                                                                                                                                  | <b>Reported on page #</b>                               |
| Risk of bias across studies        | 15       | Specify any assessment of risk of bias that may affect the cumulative evidence (e.g., publication bias, selective reporting within studies).                                                                           | p.4 line 202-203                                        |
| Additional analyses                | 16       | Describe methods of additional analyses (e.g., sensitivity or subgroup analyses, meta-regression), if done, indicating which were pre-specified.                                                                       | p.5 lines 208-218                                       |
| <b>RESULTS</b>                     |          |                                                                                                                                                                                                                        |                                                         |
| Study selection                    | 17       | Give numbers of studies screened, assessed for eligibility, and included in the review, with reasons for exclusions at each stage, ideally with a flow diagram.                                                        | p.5<br>Fig. 1                                           |
| Study characteristics              | 18       | For each study, present characteristics for which data were extracted (e.g., study size, PICOS, follow-up period) and provide the citations.                                                                           | p. 6-10<br>Table 1                                      |
| Risk of bias within studies        | 19       | Present data on risk of bias of each study and, if available, any outcome level assessment (see item 12).                                                                                                              | p.23<br>Supplementary<br>Figures S1 and S2              |
| Results of individual studies      | 20       | For all outcomes considered (benefits or harms), present, for each study: (a) simple summary data for each intervention group (b) effect estimates and confidence intervals, ideally with a forest plot.               | 5-7                                                     |
| Synthesis of results               | 21       | Present results of each meta-analysis done, including confidence intervals and measures of consistency.                                                                                                                | p.11-16<br>Fig.2-3<br>Table 2                           |
| Risk of bias across studies        | 22       | Present results of any assessment of risk of bias across studies (see Item 15).                                                                                                                                        | p.11 lines 266-273<br>p.15 lines 371-374<br>Figure S3   |
| Additional analysis                | 23       | Give results of additional analyses, if done (e.g., sensitivity or subgroup analyses, meta-regression [see Item 16]).                                                                                                  | p.13-15 Lines 313-367<br>p.16 lines 381-389<br>Table S1 |
| <b>DISCUSSION</b>                  |          |                                                                                                                                                                                                                        |                                                         |
| Summary of evidence                | 24       | Summarize the main findings including the strength of evidence for each main outcome; consider their relevance to key groups (e.g., healthcare providers, users, and policy makers).                                   | p.16 lines 393-437                                      |
| Limitations                        | 25       | Discuss limitations at study and outcome level (e.g., risk of bias), and at review-level (e.g.,                                                                                                                        | p.17 lines 439-454                                      |



|                |    |                                                                                                                                            |                                                                                             |
|----------------|----|--------------------------------------------------------------------------------------------------------------------------------------------|---------------------------------------------------------------------------------------------|
|                |    | incomplete retrieval of identified research, reporting bias).                                                                              |                                                                                             |
| Conclusions    | 26 | Provide a general interpretation of the results in the context of other evidence, and implications for future research.                    | P.17 lines 465-486                                                                          |
| <b>FUNDING</b> |    |                                                                                                                                            |                                                                                             |
| Funding        | 27 | Describe sources of funding for the systematic review and other support (e.g., supply of data); role of funders for the systematic review. | Funding information is entered in the financial disclosure section of the submission system |

905

906

907 Table S1: Subgroup analysis for the associations between HCQ+AZI and mortality risk of  
 908 patients with COVID-19 (observational studies)

| <b>Subgroup analysis for the associations between HCQ and mortality risk of patients with COVID-19 (excluding interventional studies)</b> |    |                  |                    |                     |                      |
|-------------------------------------------------------------------------------------------------------------------------------------------|----|------------------|--------------------|---------------------|----------------------|
|                                                                                                                                           | N  | RRpooled         | Heterogeneity      |                     |                      |
|                                                                                                                                           |    |                  | I <sup>2</sup> (%) | P <sub>within</sub> | P <sub>between</sub> |
| <b>HCQ alone</b>                                                                                                                          |    |                  |                    |                     |                      |
| All Studies                                                                                                                               | 13 |                  |                    |                     |                      |
| Type of article                                                                                                                           |    |                  |                    |                     |                      |
| Peer-reviewed                                                                                                                             | 9  | 0.76 [0.51-1.13] | 85%                | <0.01               | 0.84                 |
| Unpublished                                                                                                                               | 4  | 0.81 [0.52-1.27] | 72%                | 0.01                |                      |
| Adjusted estimate                                                                                                                         |    |                  |                    |                     |                      |
| Yes                                                                                                                                       | 9  | 0.91 [0.67-1.24] | 70%                | <0.01               | 0.0001               |
| No                                                                                                                                        | 4  | 0.44 [0.35-0.55] | 0%                 | 0.52                |                      |
| Risk estimated                                                                                                                            |    |                  |                    |                     |                      |
| Reported in the paper                                                                                                                     | 11 | 0.83 [0.61-1.11] | 72%                | <0.01               | 0.82                 |
| Calculated                                                                                                                                | 2  | 0.69 [0.15-3.25] | 54%                | 0.14                |                      |
| Risk of bias                                                                                                                              |    |                  |                    |                     |                      |
| Moderate                                                                                                                                  | 5  | 1.02 [0.88-1.18] | 0%                 | 0.9                 | 0.18                 |
| Serious                                                                                                                                   | 6  | 0.63 [0.38-1.04] | 89%                | <0.01               |                      |
| Critical                                                                                                                                  | 2  | 0.75 [0.16-3.58] | 44%                | 0.18                |                      |
| Continents                                                                                                                                |    |                  |                    |                     |                      |
| America                                                                                                                                   | 6  | 1.05 [0.93-1.19] | 30%                | 0.2                 | <0.0001              |
| Asia                                                                                                                                      | 1  | 0.36 [0.18-0.73] | NA                 | NA                  |                      |
| Europe                                                                                                                                    | 5  | 0.45 [0.37-0.55] | 0%                 | 0.47                |                      |
| Multiple                                                                                                                                  | 1  | 1.06 [0.51-2.20] | NA                 | NA                  |                      |
| Mean daily dose                                                                                                                           |    |                  |                    |                     |                      |
| Not specified                                                                                                                             | 6  | 0.58 [0.39-0.85] | 80%                | <0.01               | 0.029                |
| <500 mg/d                                                                                                                                 | 4  | 1.06 [0.84-1.33] | 0%                 | 0.75                |                      |
| >500 mg/d                                                                                                                                 | 3  | 0.58 [0.39-0.85] | 80%                | <0.01               |                      |
| Age                                                                                                                                       |    |                  |                    |                     |                      |
| 63 years or less                                                                                                                          | 6  | 0.89 [0.64-1.24] | 59%                | 0.03                | 0.39                 |
| 64 years or more                                                                                                                          | 7  | 0.69 [0.43-1.10] | 89%                | <0.01               |                      |

|                                                                                            |    |                  |     |       |      |
|--------------------------------------------------------------------------------------------|----|------------------|-----|-------|------|
| Cancer or hemodialysis patient based-population                                            |    |                  |     |       |      |
| No                                                                                         | 10 | 0.83 [0.59-1.18] | 85% | <0.01 | 0.34 |
| Yes                                                                                        | 3  | 0.61 [0.35-1.06] | 43% | 0.17  |      |
| Influence analysis (exclusion of Yu et al, Magagnoli et al, Membrillo et al, Ayerbe et al) | 9  | 0.95 [0.84-1.08] | 27% | 0.20  |      |

909

910

911

912

913

914

915

916

917

918

919

920

921

922

923

924

925

926

927

928

929

930
